# Supplementary material for: Phosphorus ylides of cage-opened sulphide [60]fullerene derivatives
Source: Royal Society of Chemistry journal article supplement (doi:10.1039/d2dt03214g), 2022-01-01
Supplement: d2dt03214g1.pdf [file d2dt03214g1.pdf]

**Supporting Information**

Phosphorus ylides of  
cage-opened sulphide [60]fullerene derivatives

Yoshifumi Hashikawa, Nana Fujikawa, Shu Okamoto, and Yasujiro Murata\*

*Institute for Chemical Research, Kyoto University, Uji, Kyoto 611-0011, Japan*

*Fax: (+81)774-38-3178*

*E-mail: yasujiro@scl.kyoto-u.ac.jp*

## Contents

|                                                          |     |
|----------------------------------------------------------|-----|
| 1. General                                               | S3  |
| 2. Computational Methods                                 | S4  |
| 3. Synthesis                                             | S4  |
| 3.1. Synthesis of <b>3a–c</b> from <b>1</b>              | S5  |
| 3.2. Synthesis of <b>3b</b> and <b>3c</b> from <b>3a</b> | S9  |
| 3.3. Reaction of <b>3a</b> with PPh <sub>3</sub>         | S10 |
| 3.4. Reaction of <b>3b</b> with PPh <sub>3</sub>         | S11 |
| 3.5. Reaction of <b>3b</b> with PR <sub>3</sub>          | S17 |
| 4. H/D Exchange                                          | S24 |
| 5. DFT Calculations                                      | S26 |
| 5.1. Mulliken Charges                                    | S26 |
| 5.2. Keto-Enol Tautomerization                           | S32 |
| 6. References                                            | S38 |

## 1. General

The  $^1\text{H}$ ,  $^{13}\text{C}$ , and  $^{31}\text{P}$  NMR measurements were carried out at room temperature unless otherwise noted with a JEOL JNM ECA500 and Bruker Avance III 800US Plus instruments. The NMR chemical shifts were reported in ppm with reference to residual protons and carbons of benzene- $d_6$  ( $\delta$  7.15 ppm in  $^1\text{H}$  NMR,  $\delta$  128.00 ppm in  $^{13}\text{C}$  NMR),  $\text{CDCl}_3$  ( $\delta$  7.26 ppm in  $^1\text{H}$  NMR,  $\delta$  77.00 ppm in  $^{13}\text{C}$  NMR), and *o*-dichlorobenzene- $d_4$  (ODCB- $d_4$ ,  $\delta$  7.20 ppm in  $^1\text{H}$  NMR,  $\delta$  132.35 ppm in  $^{13}\text{C}$  NMR). The  $^{31}\text{P}$  NMR chemical shifts were reported in ppm with reference to the chemical shift of  $\text{H}_3\text{PO}_4$  ( $\delta$  0.00 ppm) in a glass sealed capillary which was inserted inside the NMR tube filled with benzene- $d_6$ . APCI (atmospheric pressure chemical ionization) mass spectra were measured on a Bruker micrOTOF-Q II. UV-vis absorption spectra were measured with a Shimadzu UV-3150 spectrometer. Cyclic voltammetry was conducted on a BAS Electrochemical Analyzer ALS620C using a three-electrode cell with a glassy carbon working electrode, a platinum wire counter electrode, and a  $\text{Ag}/\text{AgNO}_3$  reference electrode. The measurements were carried out under  $\text{N}_2$  atmosphere using ODCB solutions of 1.0 mM samples and 0.10 M tetrabutylammonium tetrafluoroborate ( $n\text{-Bu}_4\text{N}\cdot\text{BF}_4$ ) as a supporting electrolyte. The redox potentials were calibrated with ferrocene used as an internal standard which was added after each measurement. The high-performance liquid chromatography (HPLC) was performed with the use of a Cosmosil Buckyprep column (250 mm in length, 4.6 mm in inner diameter) for analytical purpose and the same columns (250 mm in length, 20 mm in inner diameter) for preparative purpose. Thin layer chromatography (TLC) was performed on glass plates coated with 0.25 mm thick silica gel 60F-254 (Merck). Column chromatography was performed using PSQ 60B (Fuji Silysia).

Fullerene  $\text{C}_{60}$  was purchased from SES Research Co. Triphenylphosphine and hexane were purchased from Nakalai Tesque, Inc. Elemental sulfur was purchased from Kanto Chemical Co., Inc. Carbon disulfide, ethyl acetate, and acetone were purchased from FUJIFILM Wako Pure Chemical Corporation. *o*-Dichlorobenzene (ODCB) was purchased from Sigma-Aldroch Co. LLC. Tetrakis(dimethylamino)ethylene (TDAE) trimethylphosphite, and trimethylphosphine (1.0 M in toluene) were purchased from Tokyo Chemical Industry Co. Ltd.

All reactions were carried out under Ar atmosphere. Unless otherwise noted, materials purchased from commercial suppliers were used without further purification. Compounds **1**<sup>1</sup>, **5a**,<sup>2</sup> and **4a-Me**<sup>2</sup> were synthesized according to literature procedures.

## 2. Computational Methods

All calculations were conducted using the Gaussian 09 program.<sup>3</sup> All structures at the stationary and transition states were optimized at the B3LYP/6-31G(d) or M06-2X/6-31G(d,p) level of theory without any symmetry assumptions and confirmed by the frequency analyses at the same level of theory. Mulliken atomic charges were calculated at the B3LYP/6-31G(d,p) level of theory using the structures optimized at the B3LYP/6-31G(d) level of theory. TD DFT calculations were performed at the CAM-B3LYP/6-31G(d) level of theory using the structures optimized at the B3LYP/6-31G(d) level of theory.

## 3. Synthesis

### 3.1. Synthesis of 3a–c from 1

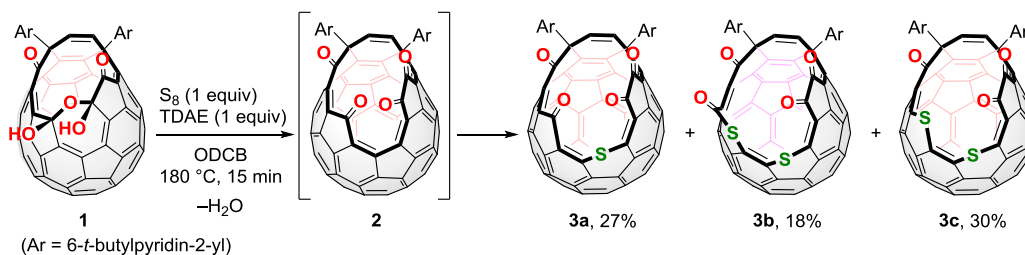

Powdery **1** (10.0 mg, 8.92  $\mu\text{mol}$ ) and  $\text{S}_8$  (2.3 mg, 9.0  $\mu\text{mol}$ , 1.0 equiv) were placed into a Schlenk tube and degassed through three vacuum-Ar cycles. ODCB (0.500 mL) and TDAE (2.06  $\mu\text{L}$ ,  $\rho = 0.8695 \text{ g/mL}$ , 8.94  $\mu\text{mol}$ , 1.00 equiv) were added and the resulting solution was heated at 180  $^\circ\text{C}$  for 15 h (Aluminum block heater). The crude mixture was purified by column chromatography using silica gel ( $\text{CS}_2/\text{acetone}$  (200:1) to (50:1)) to give **3c** (3.07 mg, 2.69  $\mu\text{mol}$ , 30%), **3b** (1.88 mg, 1.61  $\mu\text{mol}$ , 18%), and **3a** (2.76 mg, 2.43  $\mu\text{mol}$ , 27%) as brown powders.

**3a**:  $^1\text{H NMR}$  (500 MHz,  $\text{CDCl}_3$ )  $\delta$  7.61 (t, 1H,  $J = 8.0 \text{ Hz}$ ), 7.50 (t, 1H,  $J = 8.0 \text{ Hz}$ ), 7.223 (d, 1H,  $J = 8.0 \text{ Hz}$ ), 7.219 (d, 1H,  $J = 8.0 \text{ Hz}$ ), 7.12 (d, 1H,  $J = 8.0 \text{ Hz}$ ), 7.10 (d, 1H,  $J = 8.0 \text{ Hz}$ ), 7.04 (d, 1H,  $J = 10.3 \text{ Hz}$ ), 6.50 (d, 1H,  $J = 10.3 \text{ Hz}$ ), 1.21 (s, 9H), 1.08 (s, 9H), –11.43 (br s, 1H); HRMS (APCI)  $m/z$ :  $[\text{M}]^-$  Calcd for  $\text{C}_{82}\text{H}_{26}\text{N}_2\text{O}_4\text{S}$  (**3a**) 1134.1619; Found 1134.1634. (These data were matched well with the reported one.<sup>4</sup>)

**3b**:  $^1\text{H NMR}$  (500 MHz,  $\text{CDCl}_3$ )  $\delta$  7.61 (t, 1H,  $J = 8.0 \text{ Hz}$ ), 7.55 (t, 1H,  $J = 8.0 \text{ Hz}$ ), 7.21 (d, 2H,  $J = 8.0 \text{ Hz}$ ), 7.16 (d, 1H,  $J = 8.0 \text{ Hz}$ ), 6.99 (d, 1H,  $J = 8.0 \text{ Hz}$ ), 6.97 (d, 1H,  $J = 10.3 \text{ Hz}$ ), 6.38 (d, 0.50H,  $J = 10.3 \text{ Hz}$ ), 6.36 (d, 0.50H,  $J = 10.3 \text{ Hz}$ ), 1.214 (s, 4.5H), 1.209 (s, 4.5H), 1.208 (s, 4.5H), 1.202 (s, 4.5H) (A part of the proton signals for the empty and encapsulated ones was separately observed.); HRMS (APCI)  $m/z$ :  $[\text{M}]^-$  Calcd for  $\text{C}_{82}\text{H}_{26}\text{N}_2\text{O}_4\text{S}_2$  (**3b**) 1166.1339; Found 1166.1328. (These data were matched well with the reported one.<sup>4</sup>)

**3c**:  $^1\text{H NMR}$  (500 MHz,  $\text{CDCl}_3$ )  $\delta$  7.61 (t, 1H,  $J = 8.0 \text{ Hz}$ ), 7.55 (t, 1H,  $J = 8.0 \text{ Hz}$ ), 7.25 (d, 1H,  $J = 8.0 \text{ Hz}$ ), 7.21 (d, 1H,  $J = 8.0 \text{ Hz}$ ), 7.16 (d, 1H,  $J = 8.0 \text{ Hz}$ ), 7.12 (d, 1H,  $J = 8.0 \text{ Hz}$ ), 7.03 (d, 0.44H,  $J = 10.3 \text{ Hz}$ ), 7.02 (d, 0.56H,  $J = 10.3 \text{ Hz}$ ), 6.57 (d, 0.44H,  $J = 10.3 \text{ Hz}$ ), 6.56 (d, 0.56H,  $J = 10.3 \text{ Hz}$ ), 1.21 (s, 9H), 1.15 (s, 9H), –10.96 (s, 0.72H) (A

part of the proton signals for the empty and encapsulated ones was separately observed.);  
HRMS (APCI)  $m/z$ :  $[M]^-$  Calcd for  $C_{81}H_{26}N_2O_3S_2$  (**3c**) 1138.1390; Found 1138.1440.  
(These data were matched well with the reported one.<sup>4</sup>)

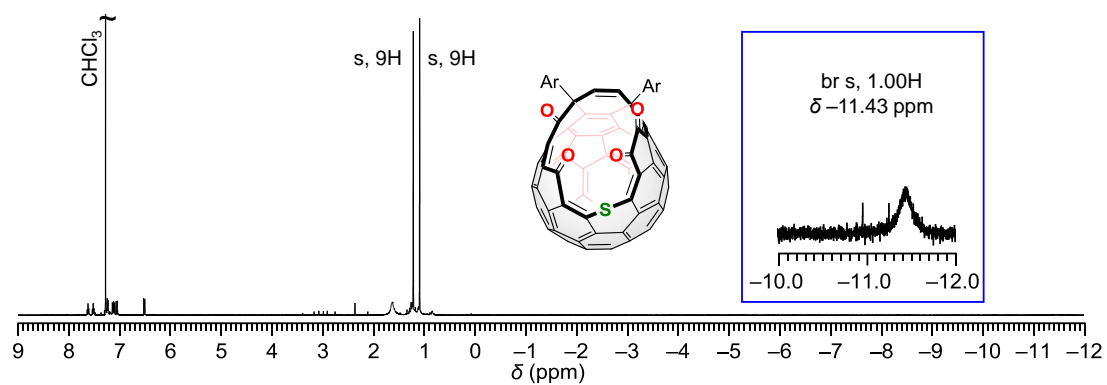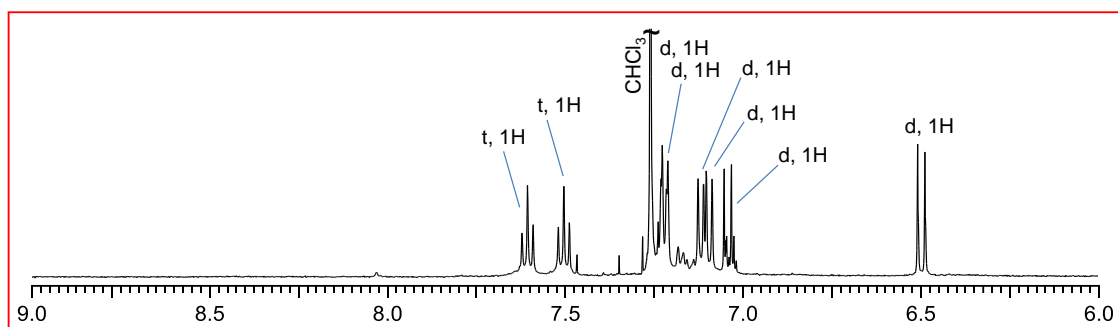

**Figure S1.**  $^1\text{H}$  NMR spectra (500 MHz,  $\text{CDCl}_3$ ) of **3a**.

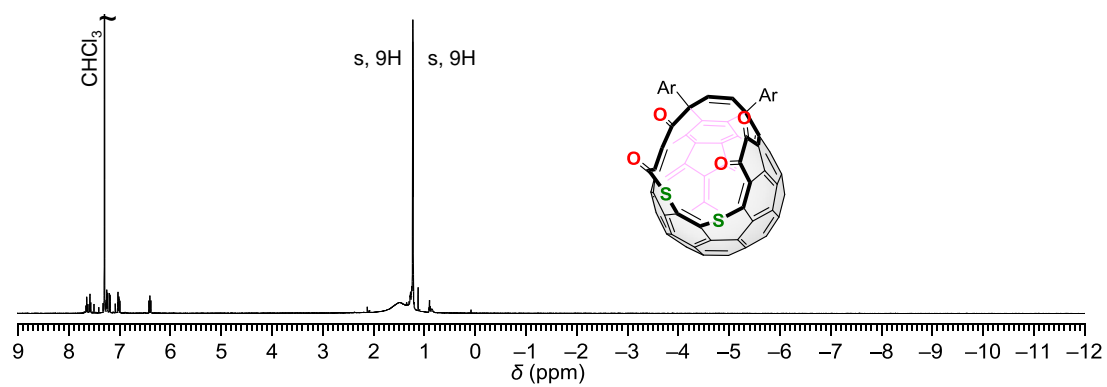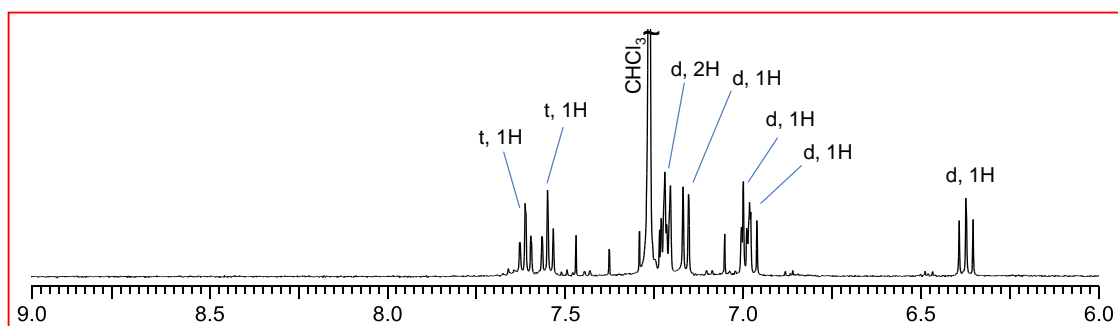

**Figure S2.**  $^1\text{H}$  NMR spectra (500 MHz,  $\text{CDCl}_3$ ) of **3b**.

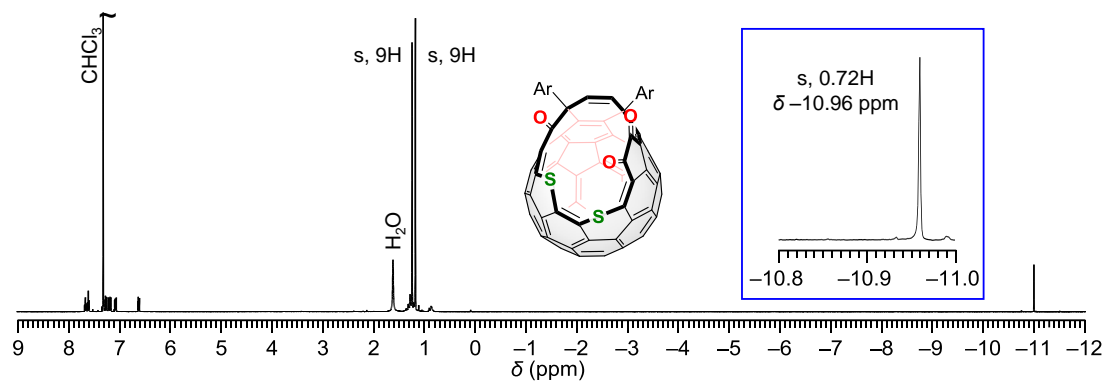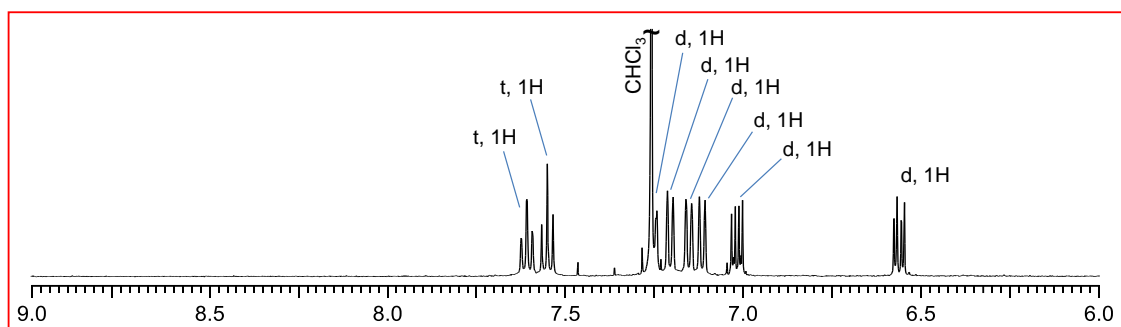

**Figure S3.**  $^1\text{H}$  NMR spectra (500 MHz,  $\text{CDCl}_3$ ) of **3c**.



## 3.2. Synthesis of **3b** and **3c** from **3a**

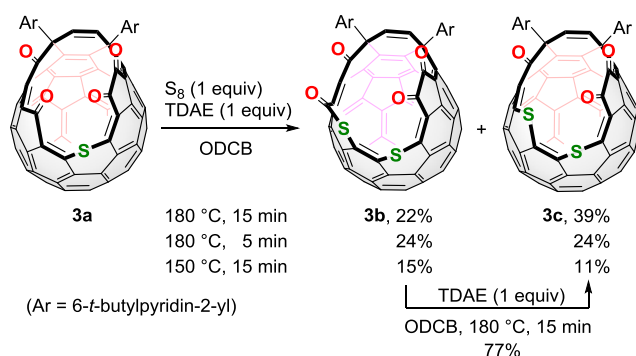

### [Synthesis of **3b** and **3c** from **3a**]

Powdery **3a** (10.0 mg, 8.81  $\mu\text{mol}$ ) and  $\text{S}_8$  (2.3 mg, 9.0  $\mu\text{mol}$ , 1.0 equiv) were placed into a Schlenk tube and degassed through three vacuum-Ar cycles. ODCB (0.500 mL) and TDAE (2.03  $\mu\text{L}$ ,  $\rho = 0.8695 \text{ g/mL}$ , 8.81  $\mu\text{mol}$ , 1.00 equiv) were added and the resulting solution was heated at 180 °C for 15 h (Aluminum block heater). The crude mixture was purified by column chromatography using silica gel ( $\text{CS}_2$ /acetone (200:1) to (50:1)) to give **3c** (3.87 mg, 3.40  $\mu\text{mol}$ , 39%), **3b** (2.28 mg, 1.95  $\mu\text{mol}$ , 22%), and unreacted **3a** (2.06 mg, 1.81  $\mu\text{mol}$ , 21%) as brown powders.

### [Conversion of **3b** into **3c**]

Powdery **3b** (5.00 mg, 4.28  $\mu\text{mol}$ ) was placed into a Schlenk tube and degassed through three vacuum-Ar cycles. ODCB (0.250 mL) and TDAE (1.00  $\mu\text{L}$ ,  $\rho = 0.8695 \text{ g/mL}$ , 4.34  $\mu\text{mol}$ , 1.01 equiv) were added and the resulting solution was heated at 180 °C for 15 h (Aluminum block heater). The crude mixture was purified by column chromatography using silica gel ( $\text{CS}_2$ /acetone (200:1)) to give **3c** (3.77 mg, 3.23  $\mu\text{mol}$ , 77%) as a brown powder.

### 3.3. Reaction of **3a** with PPh<sub>3</sub>

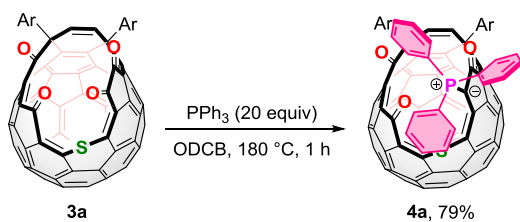

Powdery **3a** (10.0 mg, 8.81  $\mu\text{mol}$ ) and PPh<sub>3</sub> (46.3 mg, 177  $\mu\text{mol}$ , 20.0 equiv) were placed into a Schlenk tube and degassed through three vacuum-Ar cycles. ODCB (0.301 mL) was added and the resulting solution was heated at 180  $^\circ\text{C}$  for 1 h (Aluminum block heater). The crude mixture was purified by column chromatography using silica gel (CS<sub>2</sub>/acetone (100:1) to (50:1)) to give **4a** (9.65 mg, 6.99  $\mu\text{mol}$ , 79%) and unreacted **3a** (1.78 mg, 1.57  $\mu\text{mol}$ , 18%) as brown powders.

**4a**: <sup>1</sup>H NMR (500 MHz, CDCl<sub>3</sub>)  $\delta$  8.11 (br s, 6H), 7.77 (br s, 6H), 7.77–7.68 (br m, 3H), 7.54 (t,  $J$  = 7.8 Hz, 1H), 7.44 (d,  $J$  = 7.8 Hz, 1H), 7.36–7.41 (m, 2H), 7.21 (d,  $J$  = 7.9 Hz, 1H), 7.12 (d,  $J$  = 7.8 Hz, 1H), 7.05 (d,  $J$  = 7.8 Hz, 1H), 6.50 (d,  $J$  = 10.4 Hz, 1H) 1.12 (m, 18H), –11.14 (s, 1.29H); HRMS (APCI)  $m/z$ : [M]<sup>+</sup> Calcd for C<sub>88</sub>H<sub>44</sub>N<sub>5</sub>O<sub>3</sub>PS (**4a**) 1381.2614; Found 1381.2600. (These data were matched well with the reported one.<sup>2</sup>)

### 3.4. Reaction of **3b** with PPh<sub>3</sub>

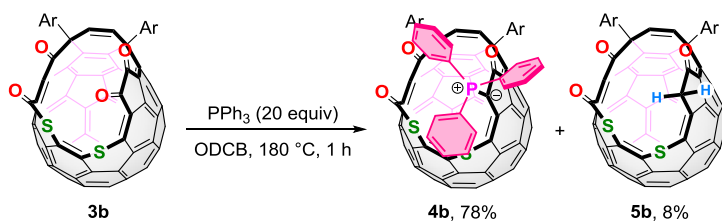

Powdery **3b** (10.0 mg, 8.56  $\mu\text{mol}$ ) and PPh<sub>3</sub> (45.0 mg, 172  $\mu\text{mol}$ , 20.0 equiv) were placed into a Schlenk tube and degassed through three vacuum-Ar cycles. ODCB (0.292 mL) was added and the resulting solution was heated at 180 °C for 1 h (Aluminum block heater). The crude mixture was purified by column chromatography using silica gel (toluene to toluene/EtOAc (100:1)) to give **5b** (0.80 mg, 0.69  $\mu\text{mol}$ , 8%) and **4b** (9.46 mg, 6.69  $\mu\text{mol}$ , 78%) as brown powders.

**4b**: <sup>1</sup>H NMR (500 MHz, benzene-*d*<sub>6</sub>)  $\delta$  8.00 (br s, 6H), 7.75 (d, 0.25H, *J* = 10.3 Hz), 7.73 (d, 0.75H, *J* = 10.3 Hz), 7.40 (br s, 6H), 7.30 (d, 0.25H, *J* = 8.0 Hz), 7.27 (d, 0.75H, *J* = 8.0 Hz), 7.23 (br s, 3H), 7.211 (d, 0.25H, *J* = 8.0 Hz), 7.205 (d, 0.75H, *J* = 8.0 Hz), 7.06 (d, 0.25H, *J* = 8.0 Hz), 7.05 (d, 0.75H, *J* = 8.0 Hz), 6.99 (d, 0.5H, *J* = 8.0 Hz), 6.97 (d, 0.5H, *J* = 8.0 Hz), 6.87 (d, 0.5H, *J* = 10.3 Hz), 6.86 (d, 0.25H, *J* = 10.3 Hz), 6.85 (d, 0.25H, *J* = 10.3 Hz), 6.743 (d, 1H, *J* = 8.0 Hz), 6.735 (d, 1H, *J* = 8.0 Hz), 1.244 (s, 4.5H), 1.239 (s, 4.5H), 1.11 (s, 4.5H), 1.10 (s, 4.5H), -10.11 (s, 0.76H) (The proton signals of the empty and encapsulated ones were separately observed.); <sup>13</sup>C NMR (126 MHz, benzene-*d*<sub>6</sub>)  $\delta$  195.55, 195.50, 195.41, 183.85, 183.81, 168.34, 168.31, 167.91, 165.24, 165.01, 164.65, 164.51, 153.79, 153.68, 153.58, 153.31, 153.22, 153.12, 152.79, 152.76, 152.58, 152.43, 152.35, 151.98, 151.87, 151.79, 151.72, 151.684, 151.680, 151.61, 151.58, 151.48, 151.44, 151.40, 151.20, 151.18, 151.09, 151.05, 151.00, 150.75, 150.58, 150.55, 150.51, 150.37, 149.61, 149.57, 149.56, 149.43, 149.37, 149.33, 149.16, 148.38, 148.36, 148.32, 148.18, 148.14, 148.05, 147.87, 147.68, 146.34, 146.26, 146.19, 146.02, 145.98, 145.96, 145.90, 145.73, 145.61, 145.53, 145.51, 145.48, 145.46, 145.44, 145.37, 145.29, 145.26, 145.23, 145.21, 145.18, 145.06, 144.83, 144.80, 144.14, 144.12, 144.07, 144.05, 144.03, 143.87, 143.84, 143.82, 143.80, 143.61, 143.57, 142.08, 142.05, 141.94, 141.92, 141.88, 141.85, 141.79, 141.76, 141.66, 141.62, 141.57, 141.49, 141.24, 141.09, 141.02, 140.32, 140.28, 139.84, 139.82, 139.67, 139.55, 139.44, 139.42, 138.74, 138.65, 138.12, 138.08, 138.05, 137.96, 137.88, 137.81, 137.73, 137.69, 137.61, 137.57, 137.44, 137.31, 137.26, 137.17, 137.15, 137.11, 136.84, 136.82, 136.75, 136.70, 136.23, 136.12, 136.08, 135.96, 135.21, 135.13, 135.05, 135.03, 135.00, 134.99, 134.94, 134.84, 134.67,

134.63, 134.37, 133.42, 133.26, 133.16, 133.12, 132.90, 132.08, 132.00, 131.92, 131.74, 131.00, 130.31, 130.23, 130.15, 129.78, 129.66, 129.59, 129.57, 129.45, 129.22, 128.98, 127.18, 127.08, 126.96, 126.88, 126.74, 126.67, 125.24, 124.15, 124.07, 123.56, 123.50, 123.47, 120.65, 120.59, 120.52, 120.21, 118.51, 117.31, 116.69, 116.66, 70.76 ( $J_{CP} = 122$  Hz), 70.64 ( $J_{CP} = 122$  Hz), 59.28, 55.04, 55.01, 54.97, 37.81, 37.58, 30.08, 29.96, 29.94 (The carbon signals of the empty and encapsulated ones were separately observed. The sum of carbon signal of each cage must be 82 in theory. Observed 204 (for three components, probably **4b**, H<sub>2</sub>O@**4b**, and N<sub>2</sub>@**4b**). One carbonyl, 32 sp<sup>2</sup>, and 9 sp<sup>3</sup> carbon signals are overlapped.); <sup>31</sup>P (202 MHz, benzene-*d*<sub>6</sub>) 13.50, 13.44, 13.42 (The <sup>31</sup>P signal of the empty and encapsulated ones was separately observed.); HRMS (APCI) *m/z*: [M+H]<sup>+</sup> Calcd for C<sub>100</sub>H<sub>42</sub>N<sub>2</sub>O<sub>3</sub>PS<sub>2</sub> (**4b**+H) 1413.242369; Found 1413.2314.

**5b**: <sup>1</sup>H NMR (500 MHz, CDCl<sub>3</sub>) δ 7.59 (t, 1H,  $J = 8.0$  Hz), 7.53 (t, 1H,  $J = 8.0$  Hz), 7.24 (d, 1H,  $J = 8.0$  Hz), 7.18 (d, 1H,  $J = 8.0$  Hz), 7.16 (d, 1H,  $J = 8.0$  Hz), 6.98 (d, 0.36H,  $J = 8.0$  Hz), 6.97 (d, 0.64H,  $J = 8.0$  Hz), 6.90 (d, 0.64H,  $J = 10.3$  Hz), 6.88 (d, 0.36H,  $J = 10.3$  Hz), 6.28 (d, 0.64H,  $J = 10.3$  Hz), 6.26 (d, 0.36H,  $J = 10.3$  Hz), 4.45 (d, 0.64H,  $J = 21.8$  Hz), 4.37 (d, 0.36H,  $J = 21.8$  Hz), 4.19 (d, 0.64H,  $J = 21.8$  Hz), 4.16 (d, 0.36H,  $J = 21.8$  Hz), 1.243 (s, 3.24H), 1.240 (s, 5.76H), 1.192 (s, 3.24H), 1.187 (s, 5.76H), -10.83 (s, 0.86H) (The proton signals of the empty and encapsulated ones were separately observed.); <sup>13</sup>C NMR (201 MHz, CDCl<sub>3</sub>) δ 196.50, 194.79, 194.55, 184.89, 168.75, 168.21, 164.37, 162.51, 154.39, 152.67, 151.63, 150.88, 150.73, 150.47, 150.25, 149.71, 149.38, 149.27, 149.05, 148.93, 148.73, 148.71, 148.61, 148.55, 148.45, 148.34, 148.32, 148.22, 148.19, 146.56, 146.49, 146.48, 146.30, 146.21, 145.94, 145.27, 144.90, 144.86, 144.75, 144.69, 144.23, 144.13, 143.95, 143.87, 143.85, 143.82, 143.62, 143.57, 143.36, 143.17, 143.12, 143.00, 142.88, 142.86, 142.72, 142.70, 142.50, 141.36, 141.17, 140.95, 139.34, 138.80, 138.76, 138.73, 138.58, 138.53, 138.51, 138.48, 138.34, 138.07, 138.02, 137.97, 137.53, 137.44, 137.36, 137.08, 136.94, 136.90, 136.51, 134.99, 134.42, 134.22, 134.12, 134.06, 133.93, 133.75, 133.70, 133.51, 131.12, 131.04, 130.38, 130.29, 130.02, 129.85, 129.82, 129.41, 129.36, 129.30, 129.12, 129.03, 128.93, 128.80, 128.05, 127.91, 127.78, 127.67, 126.96, 126.84, 126.76, 126.54, 126.44, 125.05, 124.98, 124.95, 124.45, 123.96, 123.93, 123.88, 121.80, 121.76, 121.55, 121.49, 119.91, 119.86, 119.62, 119.57, 119.10, 118.16, 117.41, 117.38, 116.90, 116.88, 59.95, 54.20, 54.15, 43.46, 43.41, 37.73, 37.63, 29.87, 29.70 (The sum of carbon signals must be 78 in theory. Observed 139 (for two components, **5b** and H<sub>2</sub>O@**5b**). Two carbonyl, 10 sp<sup>2</sup>, and five sp<sup>3</sup> carbon signals are overlapped.); HRMS (APCI) *m/z*: [M]<sup>-</sup> Calcd for C<sub>82</sub>H<sub>28</sub>N<sub>2</sub>O<sub>3</sub>S<sub>2</sub> (**5b**) 1152.1547; Found 1152.1521.

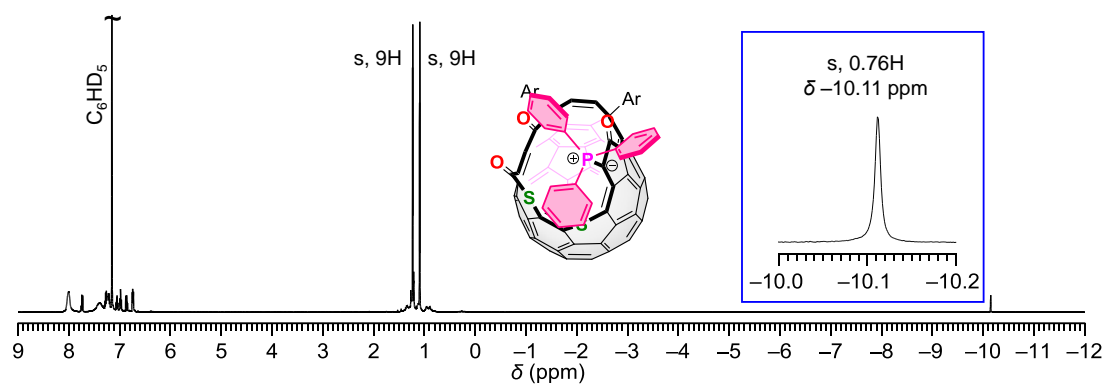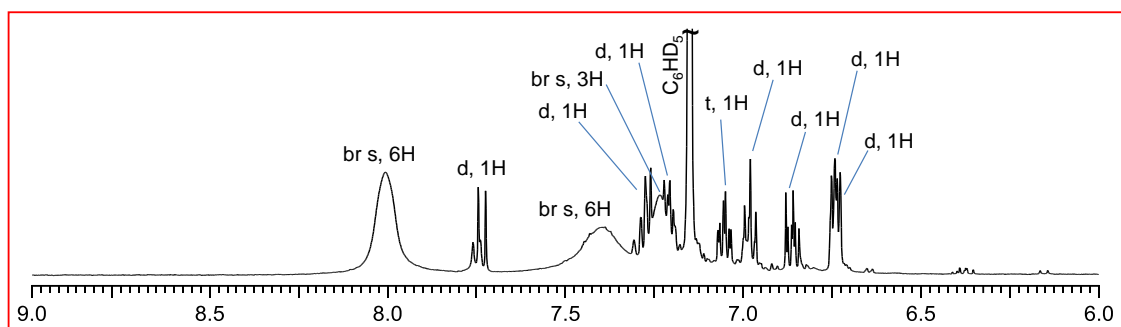

**Figure S4.**  $^1H$  NMR spectra (500 MHz, benzene- $d_6$ ) of **4b**.

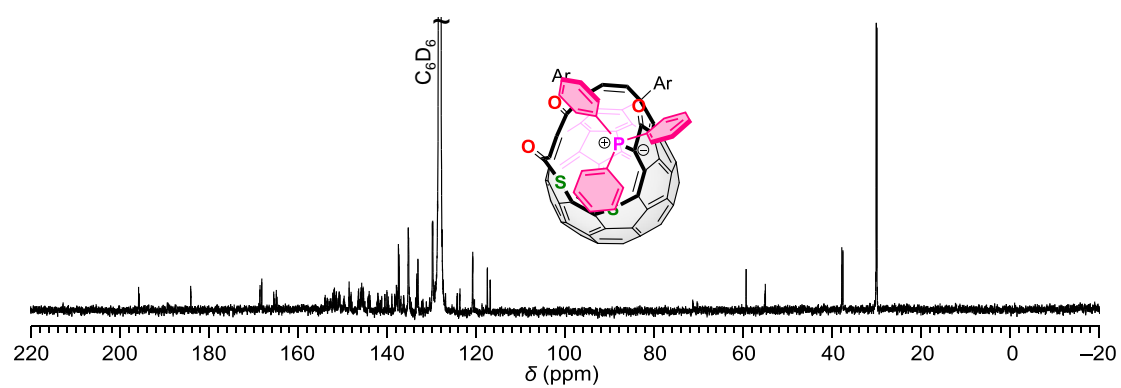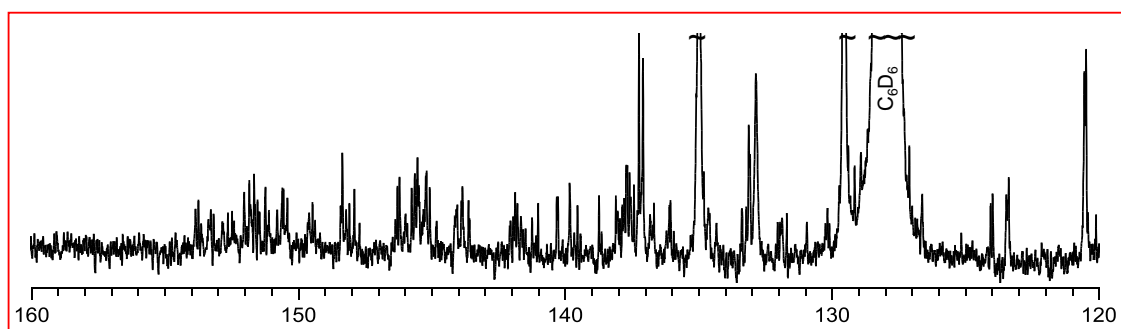

**Figure S5.**  $^{13}C$  NMR spectra (126 MHz, benzene- $d_6$ ) of **4b**.

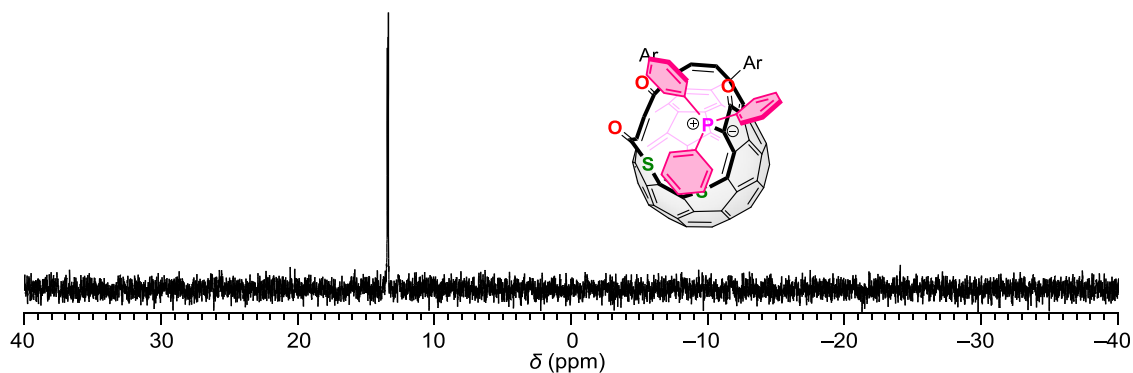

**Figure S6.**  $^{31}\text{P}$  NMR spectrum (202 MHz, benzene- $d_6$ ) of **4b**.

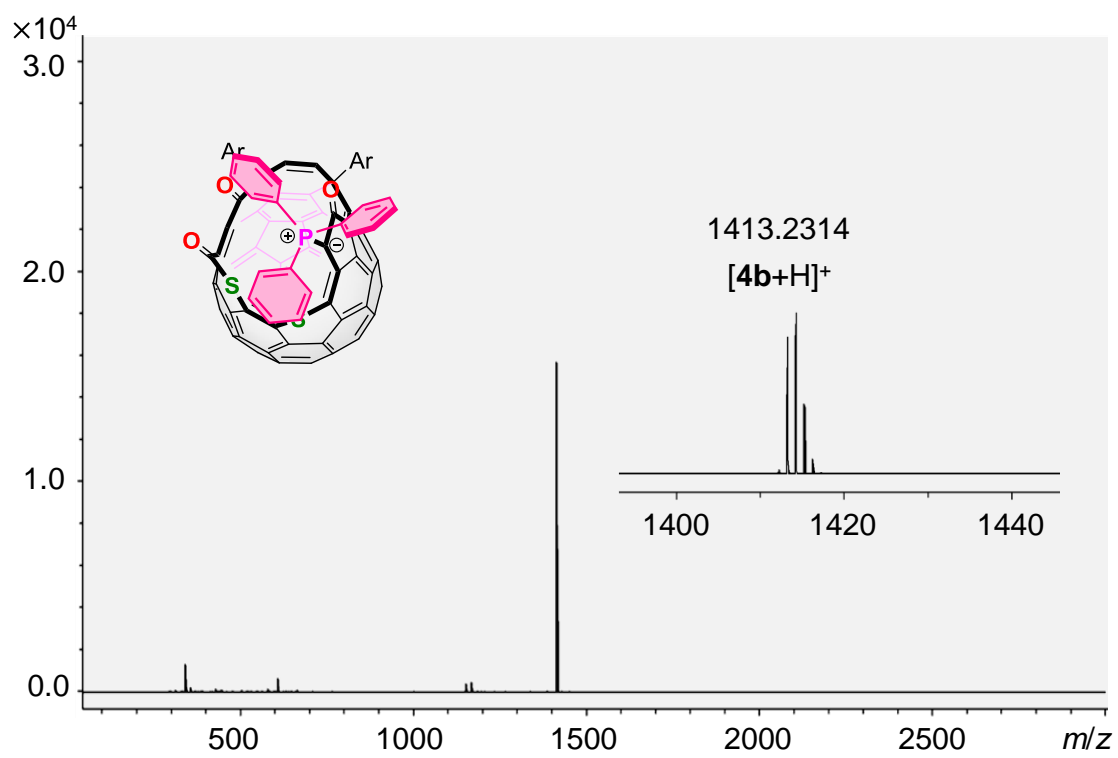

**Figure S7.** APCI mass spectra (positive ion mode) of **4b**.

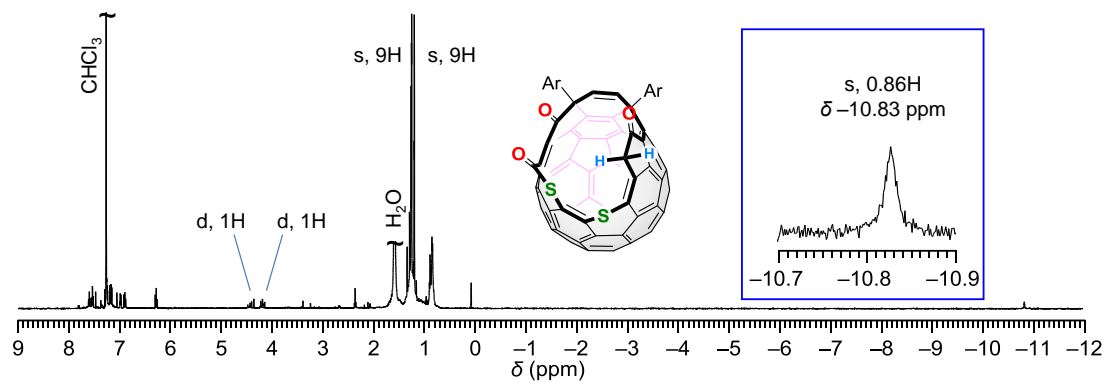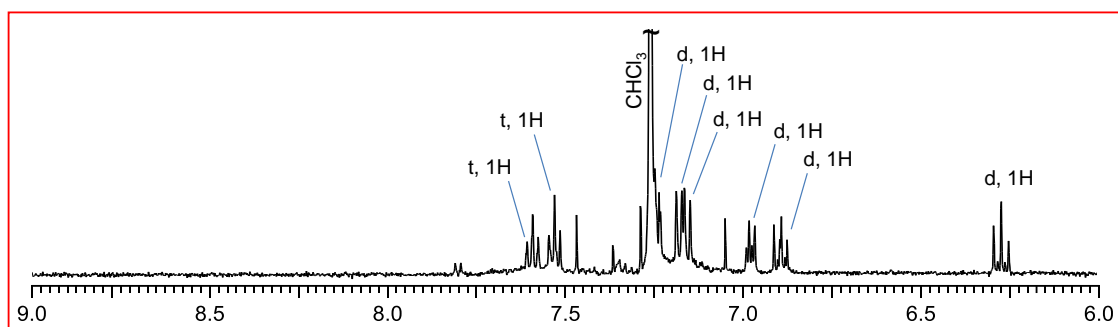

**Figure S8.**  $^1\text{H}$  NMR spectra (500 MHz,  $\text{CDCl}_3$ ) of **5b**.

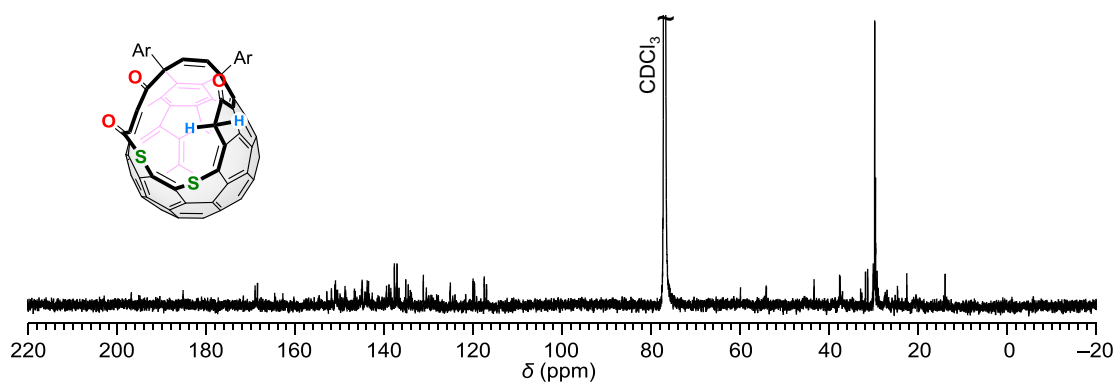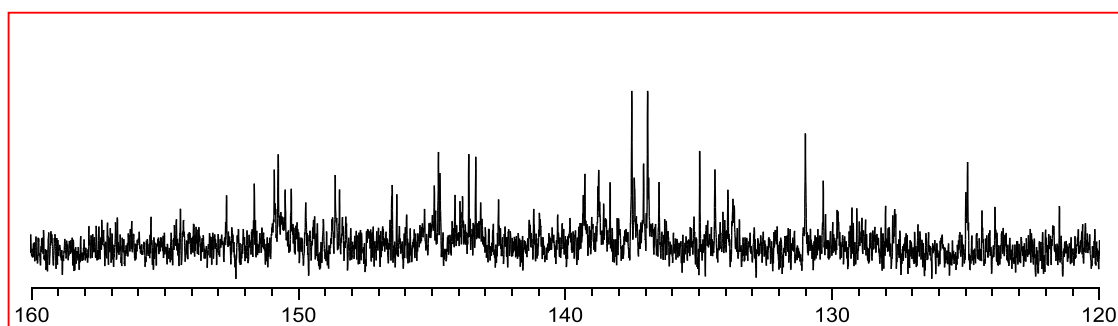

**Figure S9.**  $^{13}\text{C}$  NMR spectra (201 MHz,  $\text{CDCl}_3$ ) of **5b**.

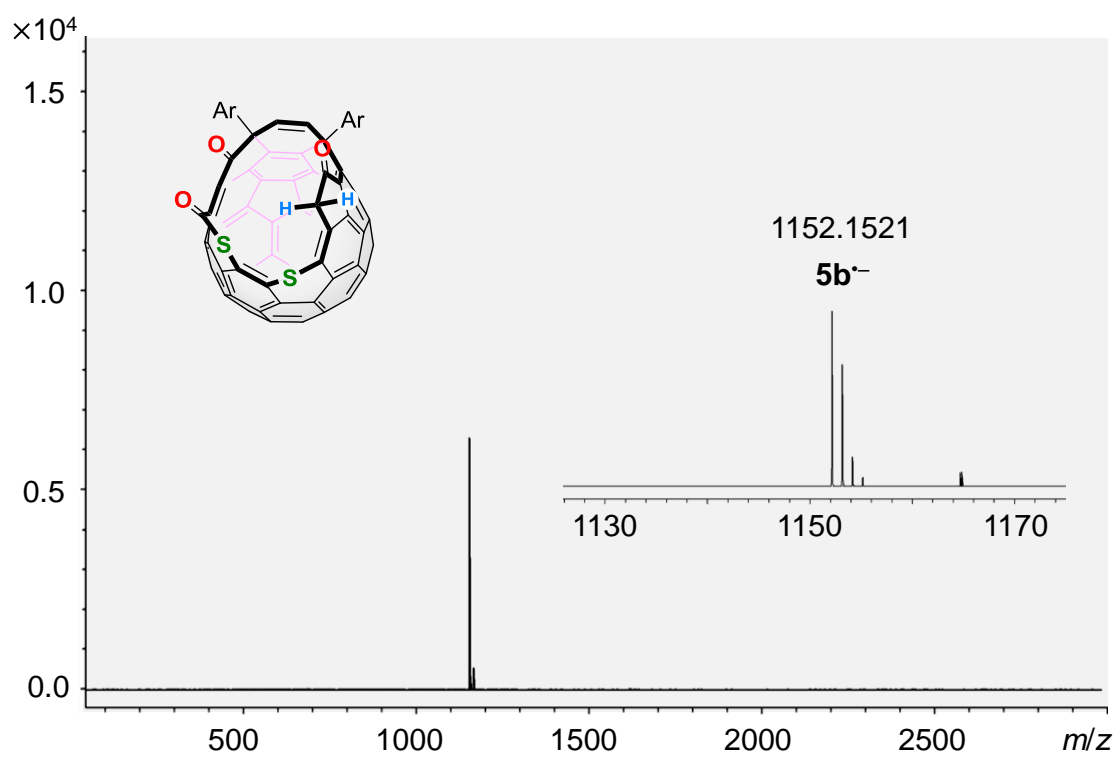

**Figure S10.** APCI mass spectrum (negative ion mode) of **5b**.



### 3.5. Reaction of **3c** with $\text{PR}_3$

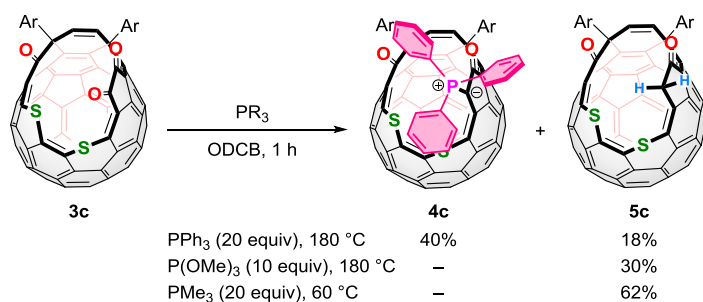

#### [Reaction with $\text{PPh}_3$ ]

Powdery **3c** (20.0 mg, 17.6  $\mu\text{mol}$ ) and  $\text{PPh}_3$  (92.0 mg, 351  $\mu\text{mol}$ , 20.0 equiv) were placed into a Schlenk tube and degassed through three vacuum-Ar cycles. ODCB (0.600 mL) was added and the resulting solution was heated at 180 °C for 1 h (Aluminum block heater). The crude mixture was purified by column chromatography using silica gel (toluene/hexane (1:1) to (3:1)) to give **5c** (3.59 mg, 3.19  $\mu\text{mol}$ , 18%), unreacted **3c** (5.42 mg, 2.70  $\mu\text{mol}$ , 15%), and **4c** (9.69 mg, 6.99  $\mu\text{mol}$ , 40%) as brown powders.

#### [Reaction with $\text{P(OMe)}_3$ ]

Powdery **3c** (10.0 mg, 8.78  $\mu\text{mol}$ ) was placed into a Schlenk tube and degassed through three vacuum-Ar cycles. ODCB (0.600 mL) and  $\text{P(OMe)}_3$  (10.4  $\mu\text{L}$ ,  $\rho = 1.052 \text{ g/mL}$ , 88.2  $\mu\text{mol}$ , 10.0 equiv) were added and the resulting solution was heated at 180 °C for 1 h (Aluminum block heater). The crude mixture was purified by column chromatography using silica gel (toluene/hexane (1:1)) to give **5c** (2.95 mg, 2.62  $\mu\text{mol}$ , 30%) as a brown powder.

#### [Reaction with $\text{PMe}_3$ ]

Powdery **3c** (10.0 mg, 8.78  $\mu\text{mol}$ ) was placed into a Schlenk tube and degassed through three vacuum-Ar cycles. ODCB (0.300 mL) and  $\text{PMe}_3$  (1.0 M in toluene, 176  $\mu\text{L}$ , 176  $\mu\text{mol}$ , 20.0 equiv) were added and the resulting solution was heated at 60 °C for 1 h (Aluminum block heater). The crude mixture was purified by column chromatography using silica gel ( $\text{CS}_2/\text{EtOAc}$  (100:1)) to give **5c** (6.10 mg, 5.42  $\mu\text{mol}$ , 62%) as a brown powder.

**4c:**  $^1\text{H}$  NMR (500 MHz, benzene- $d_6$ )  $\delta$  8.17 (dd, 6H,  $J = 8.0$  Hz,  $J_{\text{HP}} = 12.6$  Hz), 7.75 (d, 0.65H,  $J = 10.3$  Hz), 7.74 (d, 0.35H,  $J = 10.3$  Hz), 7.42 (d, 0.35H,  $J = 8.0$  Hz), 7.41 (d, 0.65H,  $J = 8.0$  Hz), 7.43–7.33 (m, 6H), 7.282 (d, 0.35H,  $J = 8.0$  Hz), 7.275 (d, 0.65H,  $J = 8.0$  Hz), 7.22 (br t, 3H,  $J = 8.0$  Hz), 7.12 (t, 1H,  $J = 8.0$  Hz), 7.01 (t, 1H,  $J = 8.0$  Hz), 6.96 (d, 0.65H,  $J = 10.3$  Hz), 6.95 (d, 0.35H,  $J = 10.3$  Hz), 6.77 (d, 1H,  $J = 8.0$  Hz), 6.76 (d, 1H,  $J = 8.0$  Hz), 1.24 (s, 3.15H), 1.23 (s, 5.85H), 1.133 (s, 3.15H), 1.126 (s, 5.85H), –10.45 (s, 1.30H) (The proton signals of the empty and encapsulated ones were separately observed.);  $^{13}\text{C}$  NMR (126 MHz, benzene- $d_6$ )  $\delta$  198.89, 188.91, 188.83, 168.04, 167.99, 167.96, 167.83, 165.29, 164.47, 157.71, 154.14, 154.11, 153.91, 153.23, 152.22, 151.85, 151.34, 151.06, 150.89, 150.71, 150.68, 150.23, 149.94, 149.90, 149.74, 148.62, 148.60, 148.35, 148.18, 147.72, 146.02, 145.91, 145.85, 145.82, 145.68, 145.62, 145.38, 145.30, 145.28, 145.21, 145.18, 145.12, 144.98, 144.75, 144.68, 143.93, 143.83, 143.60, 143.57, 142.55, 142.51, 142.43, 142.29, 141.71, 141.52, 140.78, 140.16, 139.78, 138.10, 138.04, 137.97, 137.93, 137.82, 137.74, 137.34, 137.27, 137.19, 137.06, 136.56, 136.11, 135.70, 135.43, 135.25, 135.14, 135.07, 134.07, 133.57, 132.87, 132.74, 132.30, 132.24, 131.01, 129.90, 129.66, 129.54, 129.43, 129.28, 125.91, 125.64, 124.90, 123.49, 123.39, 121.07, 121.01, 120.47, 120.44, 117.36, 117.34, 116.65, 116.61, 70.85 ( $J_{\text{CP}} = 120$  Hz), 58.68, 55.10, 55.07, 37.73, 37.67, 37.60, 30.42, 30.11, 29.97 (The carbon signals of the empty and encapsulated ones were separately observed. The sum of carbon signal of each cage must be 81 in theory. Observed 110 (for two components, **4c** and  $\text{H}_2\text{O}@4\text{c}$ ). One carbonyl, 48  $\text{sp}^2$ , and 3  $\text{sp}^3$  carbon signals are overlapped.);  $^{31}\text{P}$  (202 MHz, benzene- $d_6$ ) 13.00, 12.93 (The  $^{31}\text{P}$  signal of the empty and encapsulated ones was separately observed.); HRMS (APCI)  $m/z$ :  $[\text{M}+\text{H}]^+$  Calcd for  $\text{C}_{99}\text{H}_{42}\text{N}_2\text{O}_2\text{PS}_2$  (**4c**+H) 1386.2453; Found 1385.2362.

**5c:**  $^1\text{H}$  NMR (500 MHz, benzene- $d_6$ )  $\delta$  7.27 (d, 1H,  $J = 10.3$  Hz), 7.184 (d, 1H,  $J = 8.0$  Hz), 7.175 (d, 1H,  $J = 8.0$  Hz), 7.14 (t, 1H,  $J = 8.0$  Hz), 7.07 (t, 1H,  $J = 8.0$  Hz), 6.81 (d, 1H,  $J = 8.0$  Hz), 6.74 (d, 1H,  $J = 8.0$  Hz), 6.79 (d, 1H,  $J = 10.3$  Hz), 4.70 (d, 0.30H,  $J = 21.8$  Hz), 4.68 (d, 0.70H,  $J = 21.8$  Hz), 3.70 (d, 0.30H,  $J = 21.8$  Hz), 3.68 (d, 0.70H,  $J = 21.8$  Hz), 1.201 (s, 2.7H), 1.196 (s, 6.3H), 1.160 (s, 2.7H), 1.156 (s, 6.3H), –11.09 (s, 1.20H) (The proton signals of the empty and encapsulated ones were separately observed.);  $^{13}\text{C}$  NMR (201 MHz, benzene- $d_6$ )  $\delta$  197.38, 197.37, 196.66, 196.57, 168.43, 168.41, 168.39, 165.08, 164.92, 163.22, 163.09, 159.36, 155.12, 155.08, 154.43, 154.41, 153.09, 152.95, 151.06, 150.94, 150.89, 150.76, 150.68, 150.64, 150.16, 150.09, 149.86, 149.76, 149.67, 149.63, 149.47, 149.43, 149.35, 149.32, 149.26, 149.08, 149.05, 148.71,

148.69, 148.65, 148.64, 148.32, 148.17, 148.14, 146.88, 146.75, 146.02, 145.84, 145.51, 145.31, 145.18, 145.08, 144.94, 144.87, 144.80, 144.66, 144.59, 144.25, 144.02, 143.83, 143.53, 143.43, 143.40, 143.38, 143.33, 143.18, 143.07, 142.85, 142.16, 142.01, 141.14, 141.12, 141.05, 140.90, 139.68, 139.65, 139.21, 139.19, 139.04, 139.00, 138.64, 138.57, 138.46, 138.44, 137.86, 137.73, 137.64, 137.46, 137.19, 137.18, 137.16, 137.09, 137.07, 137.03, 136.93, 136.79, 136.64, 136.63, 136.50, 136.40, 136.23, 135.58, 135.49, 134.19, 134.17, 133.51, 132.97, 132.65, 132.60, 132.43, 131.79, 131.75, 131.63, 131.21, 131.18, 131.15, 130.65, 129.91, 129.10, 128.50, 128.44, 127.66, 126.93, 126.42, 125.47, 120.29, 120.25, 120.22, 120.20, 117.56, 117.52, 117.03, 116.99, 59.14, 59.12, 54.71, 54.69, 43.78, 43.71, 37.70, 29.99, 29.95 (The carbon signals of the empty and encapsulated ones were separately observed. The sum of carbon signal of each cage must be 77 in theory. Observed 142 (for two components, **5c** and H<sub>2</sub>O@**5c**). The 12 sp<sup>2</sup> carbon signals are overlapped in the aromatic region.); HRMS (APCI) *m/z*: [M]<sup>-</sup> Calcd for C<sub>81</sub>H<sub>28</sub>N<sub>2</sub>O<sub>2</sub>S<sub>2</sub> (**5c**) 1124.1598; Found 1124.1559.

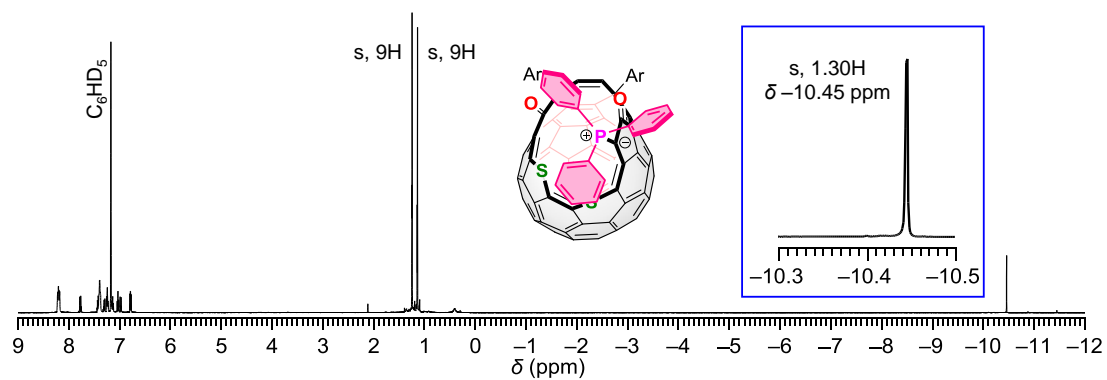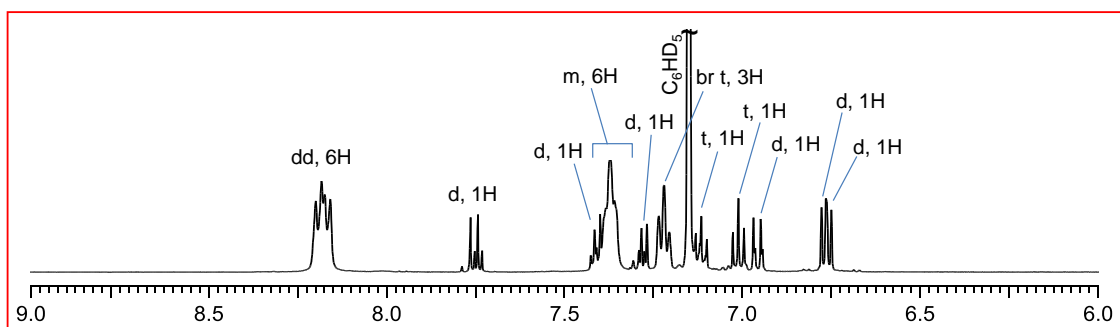

**Figure S11.**  $^1\text{H}$  NMR spectra (500 MHz, benzene- $d_6$ ) of **4c**.

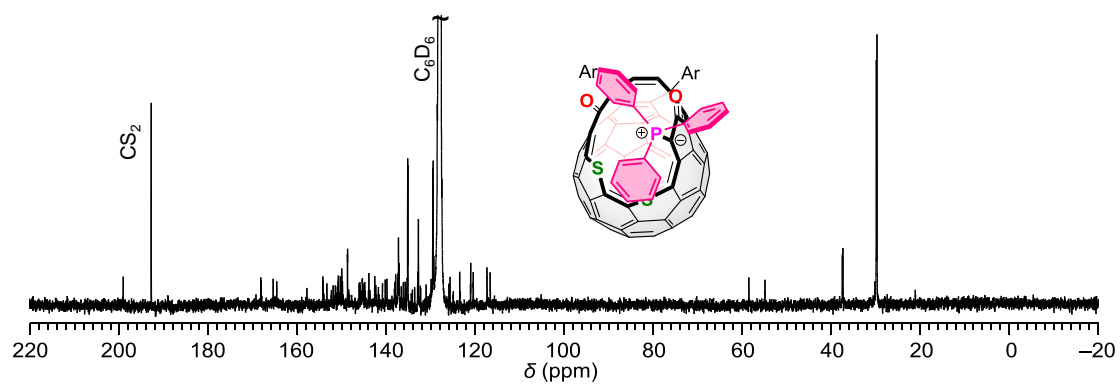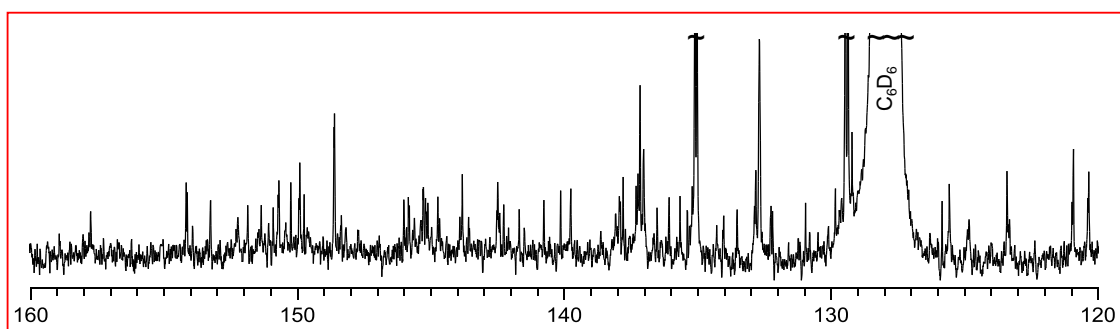

**Figure S12.**  $^{13}\text{C}$  NMR spectra (126 MHz, benzene- $d_6$ ) of **4c**.

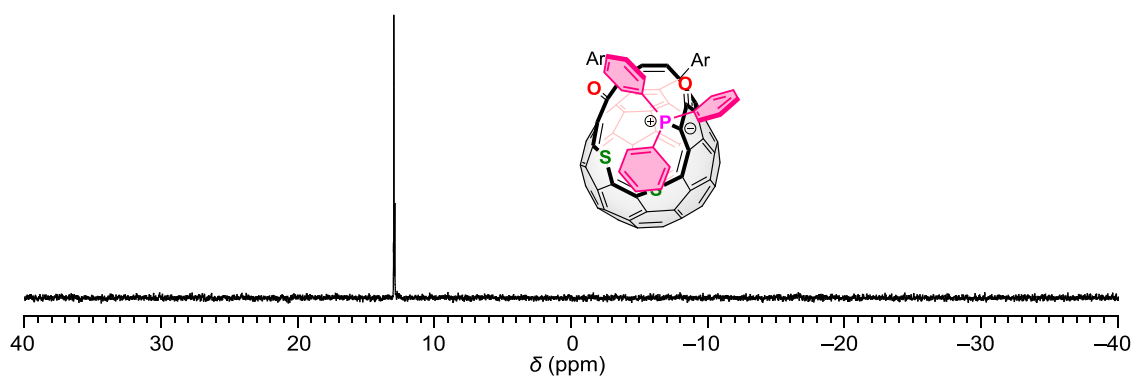

**Figure S13.**  $^{31}\text{P}$  NMR spectrum (202 MHz, benzene- $d_6$ ) of **4c**.

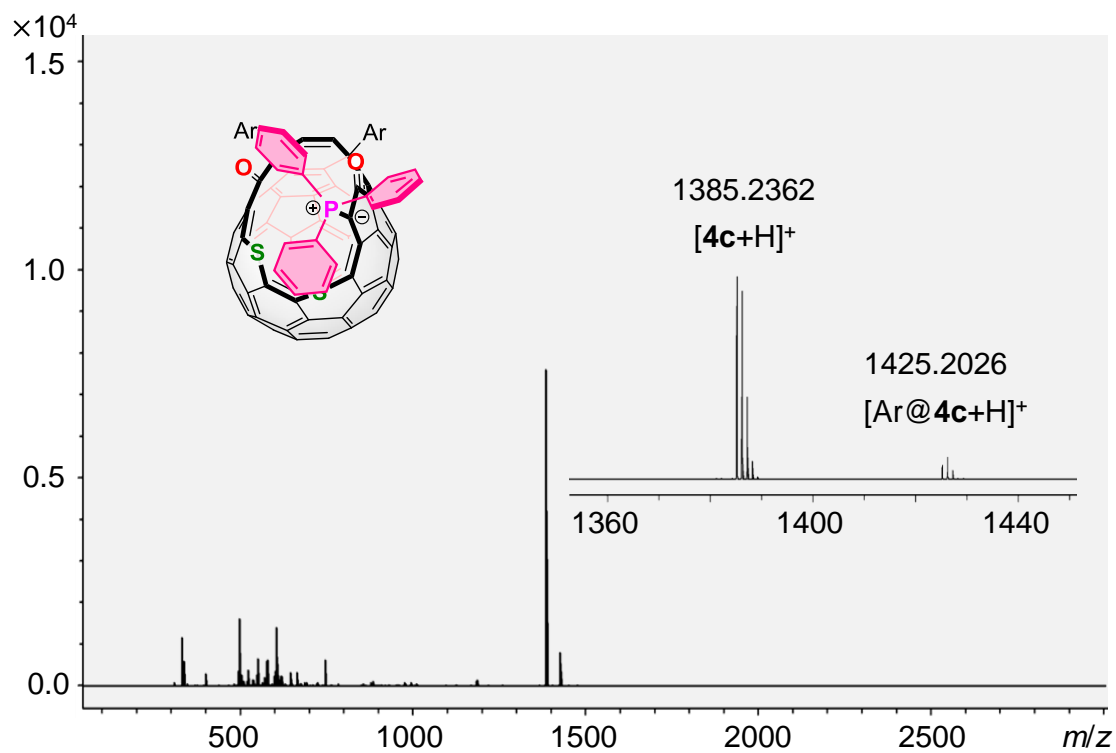

**Figure S14.** APCI mass spectra (positive ion mode) of **4c**.

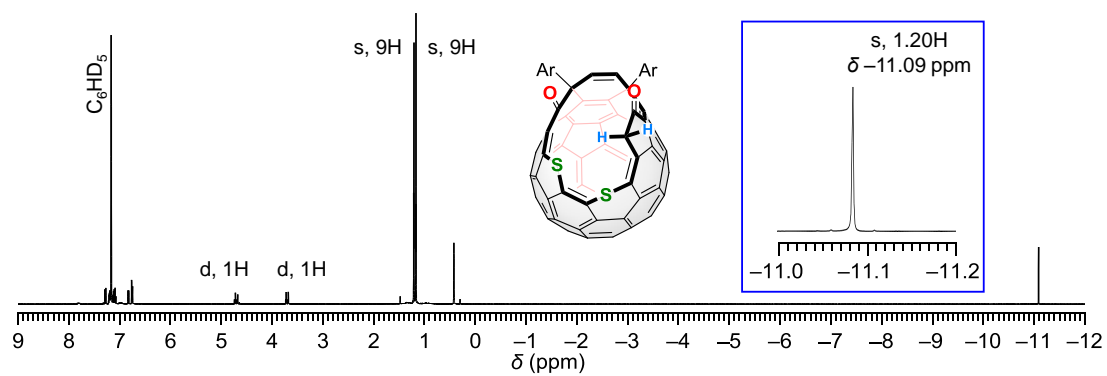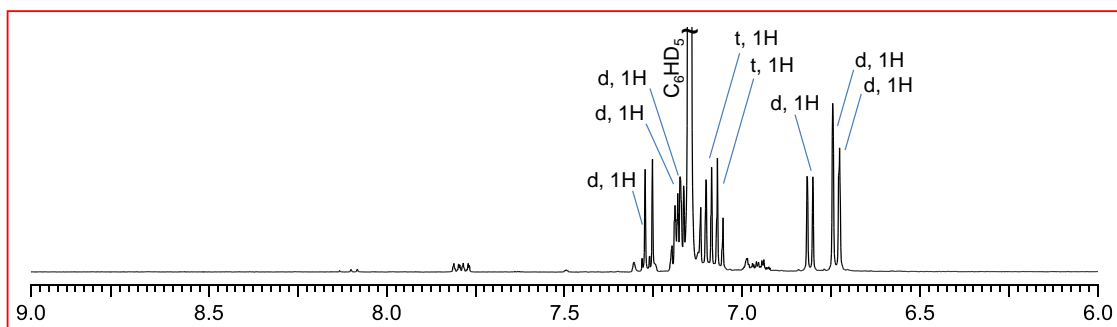

**Figure S15.**  $^1\text{H}$  NMR spectra (500 MHz, benzene- $d_6$ ) of **5c**.

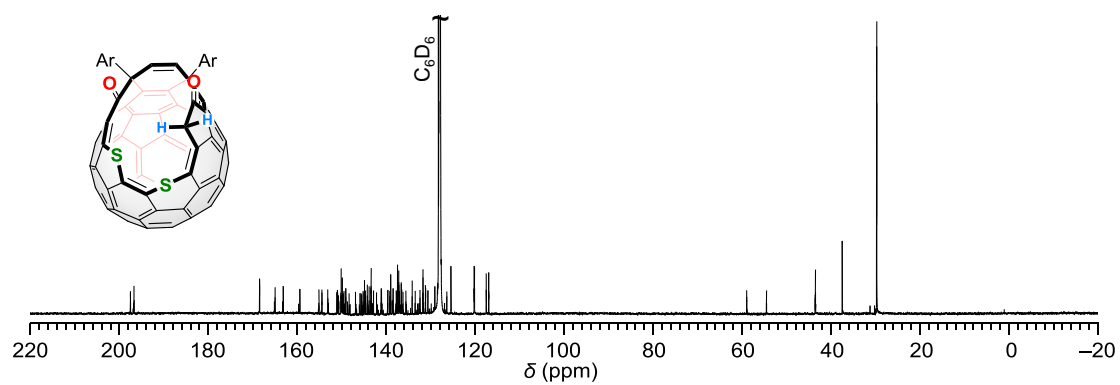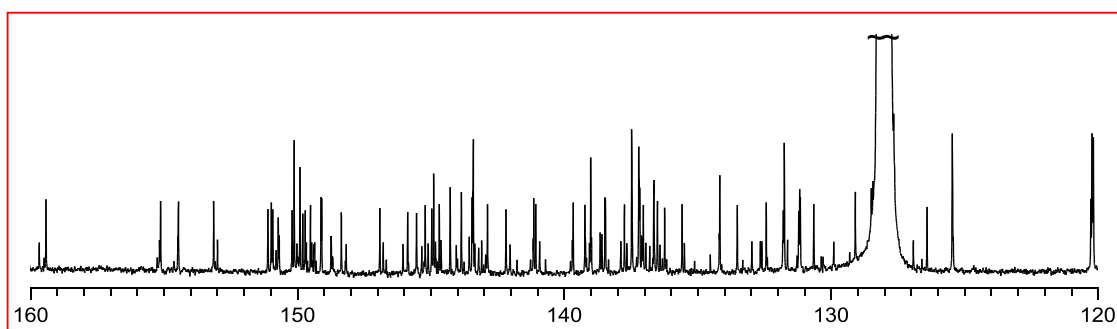

**Figure S16.**  $^{13}\text{C}$  NMR spectra (201 MHz, benzene- $d_6$ ) of **5c**.

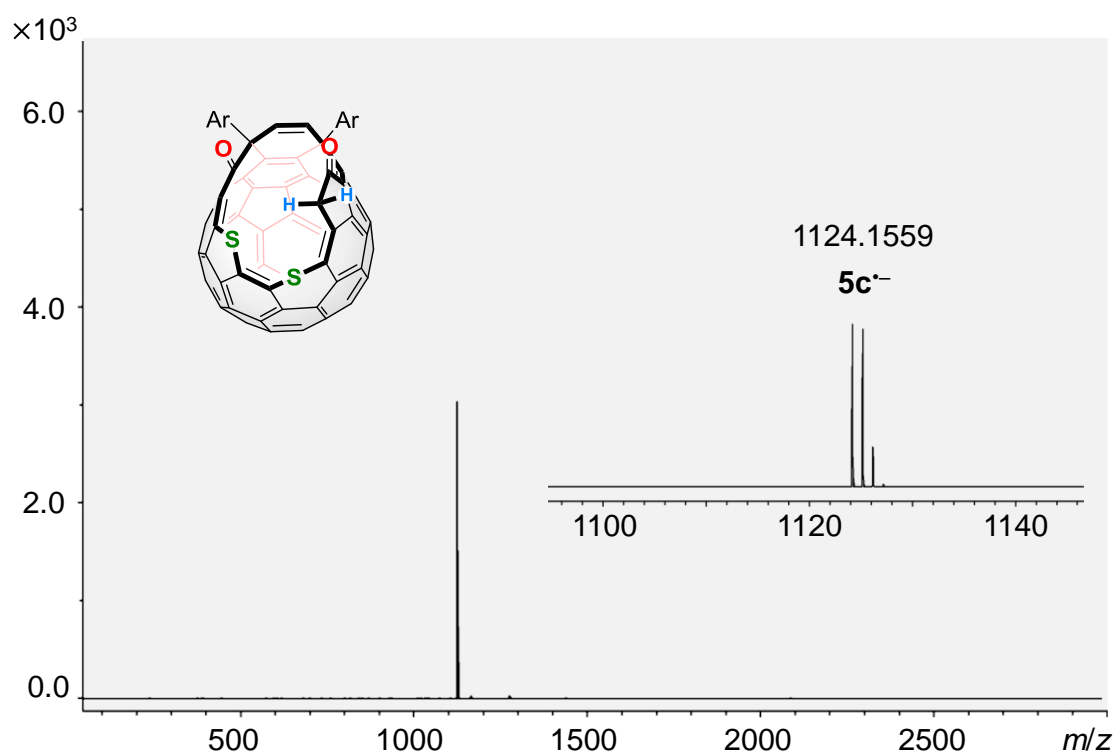

**Figure S17.** APCI mass spectra (negative ion mode) of **5c**.

## 4. H/D Exchange

Powdery **4a-Me** (5.00 mg, 4.18  $\mu\text{mol}$ ) was placed into a Schlenk tube and degassed through three vacuum-Ar cycles. ODCB (0.500 mL) and  $\text{D}_2\text{O}$  (7.57  $\mu\text{L}$ , 4.18  $\mu\text{mol}$ ,  $1.00 \times 10^3$  equiv) were added and the resulting solution was heated at 150  $^\circ\text{C}$  for 8 h (Aluminum block heater). After passing through a silica gel pad ( $\text{CS}_2/\text{EtOAc}$  (50:1)), the crude mixture was purified by HPLC equipped with the Buckyprep column (toluene, 7.5 mL/min, 50  $^\circ\text{C}$ ) to give **5a-d<sub>2</sub>** (1.10 mg, 0.70  $\mu\text{mol}$ , 23%) as a brown powder.

The reaction of **4a-Me** with water was conducted in a similar manner to obtain **5a**.<sup>2</sup>

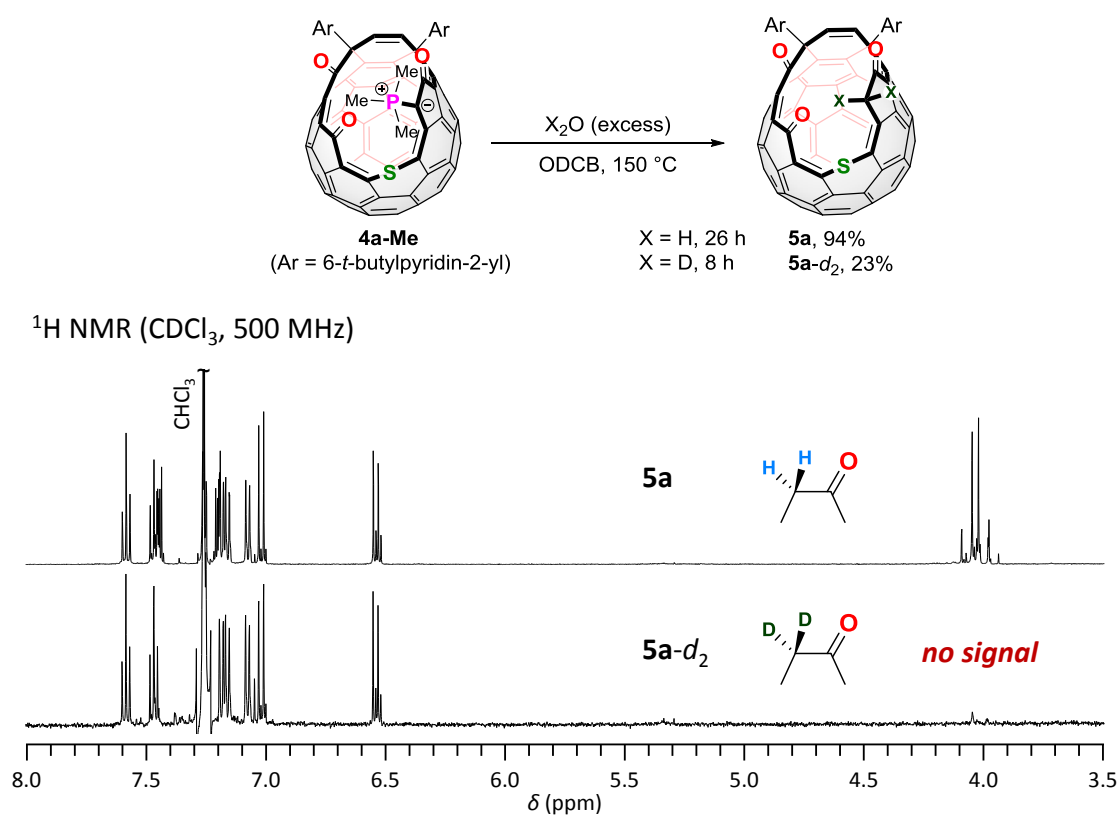

Figure S18. Hydrolysis of **4a-Me**.



To a solution of **5a** (5.03 mg, 4.47  $\mu\text{mol}$ ) in ODCB- $d_4$  (0.650 mL) which was placed into a shield NMR tube, three drops of  $\text{D}_2\text{O}$  were added and the resulting solution was heated at 150  $^\circ\text{C}$  for 37 h (oil bath). The quantitative conversion was confirmed by  $^1\text{H}$  NMR as shown below. By passing through a silica gel pad, **6a-d** was converted into **5a**.

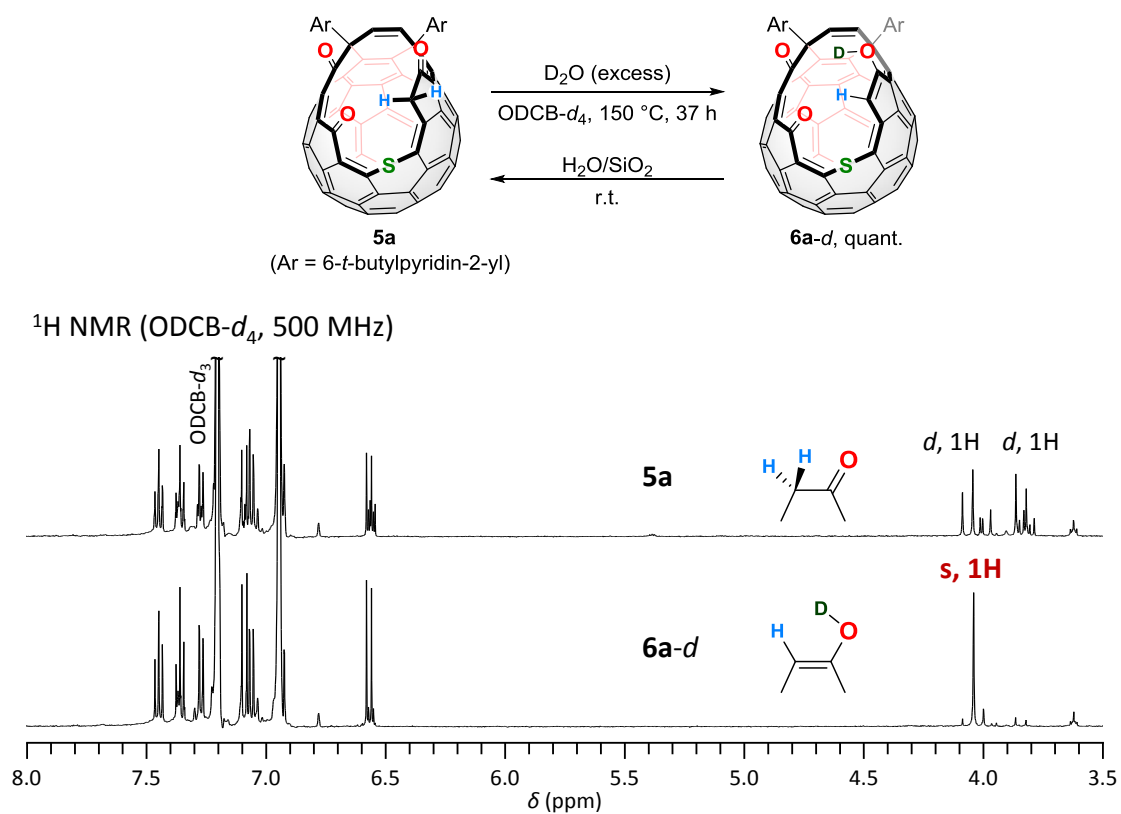

**Figure S19.** H/D exchange of **5a**.

## 5. DFT Calculations

### 5.1. Mulliken Charges

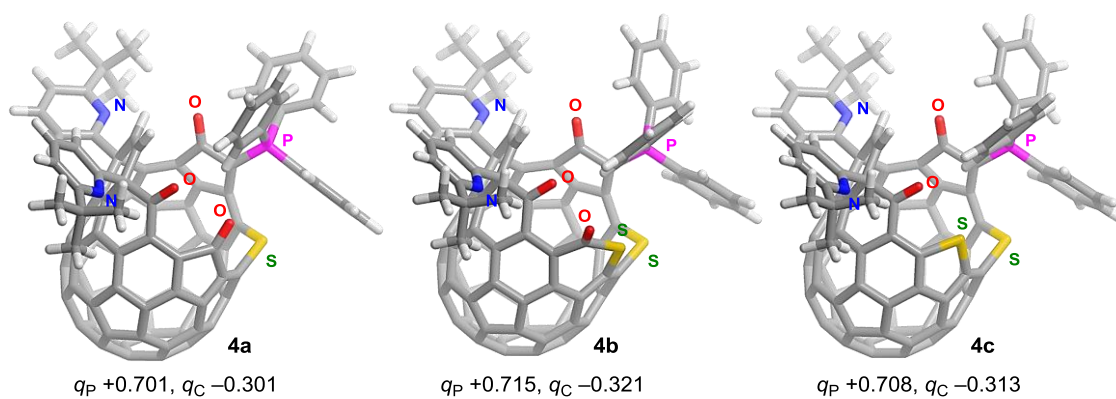

**Figure S20.** Optimized structures of **4a–c** (B3LYP/6-31G(d)) with Mulliken atomic charges (B3LYP/6-31G(d,p)).

**Table S1.** Optimized structure of **4a** (B3LYP/6-31G(d))

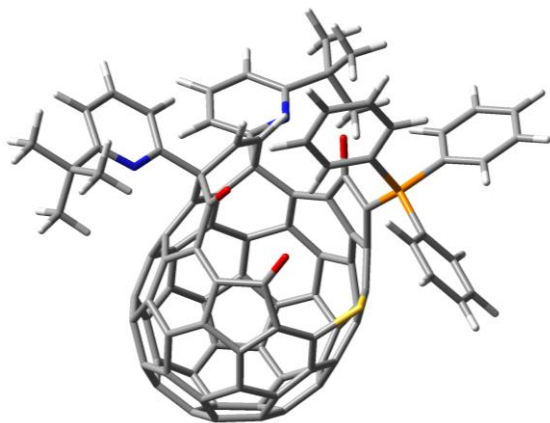

Standard orientation:

| Center Number | Atomic Number | Atomic Type | Coordinates (Angstroms) |           |           |
|---------------|---------------|-------------|-------------------------|-----------|-----------|
|               |               |             | X                       | Y         | Z         |
| 1             | 6             | 0           | 0.520897                | 3.068594  | 0.735046  |
| 2             | 6             | 0           | 0.935180                | 2.930852  | -0.523420 |
| 3             | 6             | 0           | 0.120396                | 2.343320  | -1.651925 |
| 4             | 6             | 0           | 0.689735                | 0.980735  | -2.131787 |
| 5             | 6             | 0           | 1.785303                | 0.328488  | -1.562593 |
| 6             | 6             | 0           | 2.858576                | 0.593456  | -0.496753 |
| 7             | 6             | 0           | 3.158287                | -0.697686 | 0.128662  |
| 8             | 6             | 0           | 2.390631                | -1.734613 | -0.560966 |
| 9             | 6             | 0           | 1.754167                | -2.946151 | -0.234487 |
| 10            | 6             | 0           | 0.814863                | -3.602136 | -1.143048 |
| 11            | 6             | 0           | -0.338940               | -4.407618 | -0.686346 |
| 12            | 6             | 0           | -0.764078               | -4.343290 | 0.725774  |
| 13            | 6             | 0           | 0.010185                | -3.572365 | 1.690990  |
| 14            | 6             | 0           | -0.642462               | -2.807652 | 2.656696  |
| 15            | 6             | 0           | -0.249351               | -1.413618 | 3.139722  |
| 16            | 6             | 0           | -1.578674               | -0.623351 | 3.058036  |
| 17            | 6             | 0           | -1.817372               | 0.636651  | 2.496670  |
| 18            | 6             | 0           | -0.759943               | 1.687455  | 2.395000  |
| 19            | 6             | 0           | -0.862962               | 2.724368  | 1.220875  |
| 20            | 6             | 0           | -1.733562               | 2.177080  | 0.106169  |
| 21            | 6             | 0           | -1.316900               | 2.055799  | -1.208594 |
| 22            | 6             | 0           | -2.178842               | 1.420426  | -2.182174 |
| 23            | 6             | 0           | -1.593228               | 0.560530  | -3.209214 |
| 24            | 6             | 0           | -0.165327               | 0.244422  | -3.071434 |
| 25            | 6             | 0           | 0.222595                | -1.051325 | -3.473412 |
| 26            | 6             | 0           | 1.186651                | -1.753331 | -2.691683 |
| 27            | 6             | 0           | 1.886270                | -1.084795 | -1.743417 |
| 28            | 6             | 0           | 0.742488                | -3.097227 | -2.463202 |
| 29            | 6             | 0           | -0.367035               | -3.305956 | -3.338306 |
| 30            | 6             | 0           | -0.688814               | -2.037861 | -3.978783 |
| 31            | 6             | 0           | -2.000377               | -1.696374 | -4.222287 |
| 32            | 6             | 0           | -2.453054               | -0.368421 | -3.852138 |
| 33            | 6             | 0           | -3.848065               | -0.507848 | -3.484204 |
| 34            | 6             | 0           | -4.383648               | 0.304598  | -2.499519 |
| 35            | 6             | 0           | -3.529486               | 1.263244  | -1.845501 |
| 36            | 6             | 0           | -3.942071               | 1.348325  | -0.464870 |
| 37            | 6             | 0           | -2.998988               | 1.618260  | 0.526010  |
| 38            | 6             | 0           | -3.065370               | 0.866274  | 1.782202  |
| 39            | 6             | 0           | -4.126121               | -0.047589 | 1.942446  |

|    |   |   |           |           |           |
|----|---|---|-----------|-----------|-----------|
| 40 | 6 | 0 | -3.899427 | -1.309864 | 2.593357  |
| 41 | 6 | 0 | -2.617103 | -1.599159 | 3.035916  |
| 42 | 6 | 0 | -2.054680 | -2.908108 | 2.789131  |
| 43 | 6 | 0 | -2.780833 | -3.860483 | 2.103190  |
| 44 | 6 | 0 | -2.118500 | -4.587743 | 1.045992  |
| 45 | 6 | 0 | -3.115699 | -4.879911 | 0.052038  |
| 46 | 6 | 0 | -2.732639 | -4.949344 | -1.272842 |
| 47 | 6 | 0 | -1.344699 | -4.744516 | -1.641539 |
| 48 | 6 | 0 | -1.373181 | -4.174470 | -2.974769 |
| 49 | 6 | 0 | -2.744819 | -3.875441 | -3.341605 |
| 50 | 6 | 0 | -3.057652 | -2.655911 | -3.958001 |
| 51 | 6 | 0 | -4.221103 | -1.915262 | -3.530976 |
| 52 | 6 | 0 | -5.086609 | -2.446965 | -2.568511 |
| 53 | 6 | 0 | -5.659063 | -1.583370 | -1.549925 |
| 54 | 6 | 0 | -5.316484 | -0.229944 | -1.527552 |
| 55 | 6 | 0 | -5.036604 | 0.425393  | -0.271146 |
| 56 | 6 | 0 | -5.129434 | -0.269593 | 0.924531  |
| 57 | 6 | 0 | -5.485173 | -1.678267 | 0.913675  |
| 58 | 6 | 0 | -4.704324 | -2.327816 | 1.942920  |
| 59 | 6 | 0 | -4.147305 | -3.588239 | 1.699731  |
| 60 | 6 | 0 | -4.367136 | -4.242421 | 0.431765  |
| 61 | 6 | 0 | -5.164524 | -3.641384 | -0.545602 |
| 62 | 6 | 0 | -4.769095 | -3.717416 | -1.941968 |
| 63 | 6 | 0 | -3.598505 | -4.393707 | -2.300905 |
| 64 | 6 | 0 | -5.729516 | -2.326456 | -0.303872 |
| 65 | 6 | 0 | -1.539566 | 3.997788  | 1.796729  |
| 66 | 6 | 0 | -1.413961 | 5.228333  | 1.141415  |
| 67 | 6 | 0 | -2.055906 | 6.328471  | 1.697738  |
| 68 | 6 | 0 | -2.788206 | 6.175645  | 2.875713  |
| 69 | 6 | 0 | -2.866513 | 4.910904  | 3.469659  |
| 70 | 6 | 0 | -3.636625 | 4.621798  | 4.766189  |
| 71 | 6 | 0 | -4.258214 | 5.892074  | 5.373163  |
| 72 | 6 | 0 | -2.660328 | 3.999694  | 5.790652  |
| 73 | 6 | 0 | -4.763654 | 3.610624  | 4.452868  |
| 74 | 6 | 0 | 0.179709  | 3.369619  | -2.809688 |
| 75 | 6 | 0 | -0.805658 | 4.346985  | -2.993612 |
| 76 | 6 | 0 | -0.622236 | 5.274375  | -4.014290 |
| 77 | 6 | 0 | 0.523745  | 5.209622  | -4.806550 |
| 78 | 6 | 0 | 1.468083  | 4.207711  | -4.550539 |
| 79 | 6 | 0 | 2.773020  | 4.035604  | -5.342028 |
| 80 | 6 | 0 | 3.959027  | 4.141681  | -4.355641 |
| 81 | 6 | 0 | 2.771163  | 2.630532  | -5.986975 |
| 82 | 6 | 0 | 2.935910  | 5.095842  | -6.444616 |
| 83 | 6 | 0 | 4.599590  | 0.485660  | 2.446658  |
| 84 | 6 | 0 | 3.380279  | 0.902831  | 2.995068  |
| 85 | 6 | 0 | 3.367186  | 1.840535  | 4.028094  |
| 86 | 6 | 0 | 4.566038  | 2.362721  | 4.515103  |
| 87 | 6 | 0 | 5.783791  | 1.948875  | 3.969111  |
| 88 | 6 | 0 | 5.804972  | 1.015057  | 2.934600  |
| 89 | 6 | 0 | 4.804141  | -2.415296 | 1.898238  |
| 90 | 6 | 0 | 4.706400  | -2.572038 | 3.286653  |
| 91 | 6 | 0 | 4.884467  | -3.831506 | 3.860640  |
| 92 | 6 | 0 | 5.163179  | -4.937257 | 3.056696  |
| 93 | 6 | 0 | 5.261695  | -4.786108 | 1.671673  |
| 94 | 6 | 0 | 5.085022  | -3.531190 | 1.091595  |
| 95 | 6 | 0 | 6.172275  | -0.537375 | 0.183997  |
| 96 | 6 | 0 | 6.220193  | 0.332586  | -0.918091 |
| 97 | 6 | 0 | 7.413845  | 0.510436  | -1.617434 |
| 98 | 6 | 0 | 8.571299  | -0.165369 | -1.227830 |
| 99 | 6 | 0 | 8.534643  | -1.022058 | -0.127572 |

|     |    |   |           |           |           |     |   |   |          |           |           |
|-----|----|---|-----------|-----------|-----------|-----|---|---|----------|-----------|-----------|
| 100 | 6  | 0 | 7.343227  | -1.209270 | 0.574750  | 126 | 1 | 0 | 4.905327 | 3.962474  | -4.880668 |
| 101 | 16 | 0 | 1.766414  | -3.448994 | 1.483216  | 127 | 1 | 0 | 3.857971 | 3.408573  | -3.550808 |
| 102 | 15 | 0 | 4.599562  | -0.772529 | 1.127330  | 128 | 1 | 0 | 3.716229 | 2.454234  | -6.514976 |
| 103 | 7  | 0 | -2.248624 | 3.849665  | 2.916429  | 129 | 1 | 0 | 1.954623 | 2.530150  | -6.712226 |
| 104 | 7  | 0 | 1.278142  | 3.313035  | -3.565131 | 130 | 1 | 0 | 2.645815 | 1.857447  | -5.224283 |
| 105 | 8  | 0 | 0.858229  | -1.015542 | 3.413536  | 131 | 1 | 0 | 3.879845 | 4.932508  | -6.976624 |
| 106 | 8  | 0 | 3.451542  | 1.656999  | -0.282717 | 132 | 1 | 0 | 2.961410 | 6.112635  | -6.034939 |
| 107 | 8  | 0 | 0.146967  | 1.763857  | 3.200921  | 133 | 1 | 0 | 2.128974 | 5.043934  | -7.185225 |
| 108 | 1  | 0 | 1.199016  | 3.461594  | 1.486127  | 134 | 1 | 0 | 2.443986 | 0.501046  | 2.630055  |
| 109 | 1  | 0 | 1.950297  | 3.201452  | -0.783906 | 135 | 1 | 0 | 2.410867 | 2.156518  | 4.431416  |
| 110 | 1  | 0 | -0.823512 | 5.313044  | 0.235673  | 136 | 1 | 0 | 4.554087 | 3.096128  | 5.317335  |
| 111 | 1  | 0 | -1.983659 | 7.303459  | 1.222320  | 137 | 1 | 0 | 6.718549 | 2.359677  | 4.341018  |
| 112 | 1  | 0 | -3.284048 | 7.030740  | 3.319163  | 138 | 1 | 0 | 6.754109 | 0.713196  | 2.503666  |
| 113 | 1  | 0 | -4.990976 | 6.353732  | 4.700738  | 139 | 1 | 0 | 4.478753 | -1.718295 | 3.915650  |
| 114 | 1  | 0 | -3.497001 | 6.641745  | 5.619762  | 140 | 1 | 0 | 4.803190 | -3.945752 | 4.937816  |
| 115 | 1  | 0 | -4.781380 | 5.637923  | 6.301707  | 141 | 1 | 0 | 5.301047 | -5.916456 | 3.506915  |
| 116 | 1  | 0 | -3.198011 | 3.724297  | 6.705852  | 142 | 1 | 0 | 5.474088 | -5.644893 | 1.041363  |
| 117 | 1  | 0 | -1.870230 | 4.709967  | 6.062606  | 143 | 1 | 0 | 5.169147 | -3.421758 | 0.014330  |
| 118 | 1  | 0 | -2.184068 | 3.105585  | 5.380512  | 144 | 1 | 0 | 5.337454 | 0.887258  | -1.210270 |
| 119 | 1  | 0 | -5.486459 | 4.031999  | 3.743711  | 145 | 1 | 0 | 7.436256 | 1.184663  | -2.469066 |
| 120 | 1  | 0 | -5.303895 | 3.349147  | 5.370738  | 146 | 1 | 0 | 9.497902 | -0.023370 | -1.777556 |
| 121 | 1  | 0 | -4.355411 | 2.694614  | 4.017693  | 147 | 1 | 0 | 9.430755 | -1.550870 | 0.185650  |
| 122 | 1  | 0 | -1.687684 | 4.375383  | -2.363065 | 148 | 1 | 0 | 7.330344 | -1.886257 | 1.422303  |
| 123 | 1  | 0 | -1.367958 | 6.044728  | -4.194322 |     |   |   |          |           |           |
| 124 | 1  | 0 | 0.673052  | 5.927755  | -5.603893 |     |   |   |          |           |           |
| 125 | 1  | 0 | 4.007721  | 5.139619  | -3.903143 |     |   |   |          |           |           |

The total electronic energy was calculated to be -4909.8675845 Hartree.

**Table S2.** Optimized structure of **4b** (B3LYP/6-31G(d))

|  |  |  |  |  |  |    |    |   |           |           |           |
|--|--|--|--|--|--|----|----|---|-----------|-----------|-----------|
|  |  |  |  |  |  | 15 | 16 | 0 | -0.706394 | -1.928883 | -3.759492 |
|  |  |  |  |  |  | 16 | 6  | 0 | 1.583605  | -0.369650 | -3.187100 |
|  |  |  |  |  |  | 17 | 6  | 0 | 1.897813  | 0.798067  | -2.475726 |
|  |  |  |  |  |  | 18 | 6  | 0 | 0.856690  | 1.854304  | -2.241836 |
|  |  |  |  |  |  | 19 | 6  | 0 | 1.066116  | 2.839482  | -1.033152 |
|  |  |  |  |  |  | 20 | 6  | 0 | 1.902260  | 2.184868  | 0.049000  |
|  |  |  |  |  |  | 21 | 6  | 0 | 1.488427  | 2.028018  | 1.361056  |
|  |  |  |  |  |  | 22 | 6  | 0 | 2.321126  | 1.304210  | 2.297057  |
|  |  |  |  |  |  | 23 | 6  | 0 | 1.695811  | 0.445062  | 3.299844  |
|  |  |  |  |  |  | 24 | 6  | 0 | 0.252284  | 0.209994  | 3.161593  |
|  |  |  |  |  |  | 25 | 6  | 0 | -0.204965 | -1.066459 | 3.549479  |
|  |  |  |  |  |  | 26 | 6  | 0 | -1.217356 | -1.701315 | 2.772944  |
|  |  |  |  |  |  | 27 | 6  | 0 | -1.864697 | -0.989035 | 1.819098  |
|  |  |  |  |  |  | 28 | 6  | 0 | -0.872712 | -3.076985 | 2.550599  |
|  |  |  |  |  |  | 29 | 6  | 0 | 0.241785  | -3.355160 | 3.398470  |
|  |  |  |  |  |  | 30 | 6  | 0 | 0.651190  | -2.111566 | 4.036312  |
|  |  |  |  |  |  | 31 | 6  | 0 | 1.984610  | -1.852423 | 4.261475  |
|  |  |  |  |  |  | 32 | 6  | 0 | 2.508246  | -0.546881 | 3.909590  |
|  |  |  |  |  |  | 33 | 6  | 0 | 3.887351  | -0.760848 | 3.516126  |
|  |  |  |  |  |  | 34 | 6  | 0 | 4.457879  | 0.044387  | 2.546179  |
|  |  |  |  |  |  | 35 | 6  | 0 | 3.657183  | 1.077213  | 1.938987  |
|  |  |  |  |  |  | 36 | 6  | 0 | 4.051723  | 1.180522  | 0.556053  |
|  |  |  |  |  |  | 37 | 6  | 0 | 3.116465  | 1.553807  | -0.405279 |
|  |  |  |  |  |  | 38 | 6  | 0 | 3.100362  | 0.844720  | -1.683060 |
|  |  |  |  |  |  | 39 | 6  | 0 | 4.055557  | -0.167025 | -1.883613 |
|  |  |  |  |  |  | 40 | 6  | 0 | 3.670701  | -1.395732 | -2.523638 |
|  |  |  |  |  |  | 41 | 6  | 0 | 2.361608  | -1.568243 | -2.997043 |
|  |  |  |  |  |  | 42 | 6  | 0 | 1.700085  | -2.851204 | -2.747349 |
|  |  |  |  |  |  | 43 | 6  | 0 | 2.415999  | -3.835994 | -2.060571 |
|  |  |  |  |  |  | 44 | 6  | 0 | 1.785534  | -4.624134 | -1.030961 |
|  |  |  |  |  |  | 45 | 6  | 0 | 2.798367  | -4.998891 | -0.079651 |
|  |  |  |  |  |  | 46 | 6  | 0 | 2.458298  | -5.100191 | 1.255169  |
|  |  |  |  |  |  | 47 | 6  | 0 | 1.093147  | -4.840453 | 1.675460  |
|  |  |  |  |  |  | 48 | 6  | 0 | 1.188841  | -4.280798 | 3.008477  |
|  |  |  |  |  |  | 49 | 6  | 0 | 2.584810  | -4.059868 | 3.339231  |
|  |  |  |  |  |  | 50 | 6  | 0 | 2.979365  | -2.868188 | 3.962869  |
|  |  |  |  |  |  | 51 | 6  | 0 | 4.175312  | -2.188714 | 3.525445  |

Standard orientation:

| Center Number | Atomic Number | Atomic Type | Coordinates (Angstroms) |           |           |
|---------------|---------------|-------------|-------------------------|-----------|-----------|
|               |               |             | X                       | Y         | Z         |
| 1             | 6             | 0           | -0.280572               | 3.269330  | -0.509228 |
| 2             | 6             | 0           | -0.706351               | 3.071307  | 0.737389  |
| 3             | 6             | 0           | 0.068901                | 2.365783  | 1.824796  |
| 4             | 6             | 0           | -0.565008               | 1.008178  | 2.236283  |
| 5             | 6             | 0           | -1.684880               | 0.416181  | 1.643349  |
| 6             | 6             | 0           | -2.728171               | 0.743313  | 0.558381  |
| 7             | 6             | 0           | -3.147421               | -0.537337 | -0.026358 |
| 8             | 6             | 0           | -2.436712               | -1.616045 | 0.651221  |
| 9             | 6             | 0           | -1.935024               | -2.890454 | 0.343784  |
| 10            | 6             | 0           | -1.017248               | -3.590160 | 1.242597  |
| 11            | 6             | 0           | 0.073064                | -4.455538 | 0.758223  |
| 12            | 6             | 0           | 0.452656                | -4.380824 | -0.662583 |
| 13            | 6             | 0           | -0.341200               | -3.650900 | -1.623947 |
| 14            | 6             | 0           | 0.260759                | -2.919386 | -2.644837 |

|     |    |   |           |           |           |     |    |   |           |           |           |
|-----|----|---|-----------|-----------|-----------|-----|----|---|-----------|-----------|-----------|
| 52  | 6  | 0 | 4.984874  | -2.749094 | 2.530782  | 102 | 15 | 0 | -4.605598 | -0.538360 | -1.000809 |
| 53  | 6  | 0 | 5.585598  | -1.896066 | 1.518647  | 103 | 7  | 0 | 2.376934  | 3.928726  | -2.796584 |
| 54  | 6  | 0 | 5.334162  | -0.521839 | 1.539393  | 104 | 7  | 0 | -1.020624 | 3.279149  | 3.808162  |
| 55  | 6  | 0 | 5.070826  | 0.186441  | 0.308058  | 105 | 8  | 0 | -3.188555 | 1.848916  | 0.265540  |
| 56  | 6  | 0 | 5.073762  | -0.483897 | -0.905612 | 106 | 8  | 0 | -0.174469 | 1.921834  | -2.881350 |
| 57  | 6  | 0 | 5.321335  | -1.910232 | -0.934271 | 107 | 1  | 0 | -0.930227 | 3.760599  | -1.225871 |
| 58  | 6  | 0 | 4.435513  | -2.466728 | -1.932158 | 108 | 1  | 0 | -1.698515 | 3.398195  | 1.020310  |
| 59  | 6  | 0 | 3.808125  | -3.682429 | -1.703816 | 109 | 1  | 0 | 1.428601  | 5.340124  | 0.113962  |
| 60  | 6  | 0 | 4.059214  | -4.409158 | -0.481112 | 110 | 1  | 0 | 2.681530  | 7.266338  | -0.892285 |
| 61  | 6  | 0 | 4.930386  | -3.892728 | 0.479391  | 111 | 1  | 0 | 3.698662  | 7.007482  | -3.140789 |
| 62  | 6  | 0 | 4.576745  | -3.985220 | 1.886518  | 112 | 1  | 0 | 5.145592  | 6.259719  | -4.757089 |
| 63  | 6  | 0 | 3.381338  | -4.605241 | 2.266199  | 113 | 1  | 0 | 3.596927  | 6.749838  | -5.478697 |
| 64  | 6  | 0 | 5.568932  | -2.607390 | 0.252978  | 114 | 1  | 0 | 4.686474  | 5.671415  | -6.358098 |
| 65  | 6  | 0 | 1.822356  | 4.069723  | -1.591940 | 115 | 1  | 0 | 2.873292  | 3.964003  | -6.675209 |
| 66  | 6  | 0 | 1.903721  | 5.258408  | -0.857803 | 116 | 1  | 0 | 1.729542  | 5.011402  | -5.814411 |
| 67  | 6  | 0 | 2.593642  | 6.323110  | -1.425605 | 117 | 1  | 0 | 1.966159  | 3.337936  | -5.280261 |
| 68  | 6  | 0 | 3.167169  | 6.177818  | -2.690293 | 118 | 1  | 0 | 5.502973  | 3.844215  | -3.992377 |
| 69  | 6  | 0 | 3.039415  | 4.956362  | -3.361188 | 119 | 1  | 0 | 5.062428  | 3.283117  | -5.616900 |
| 70  | 6  | 0 | 3.620273  | 4.675971  | -4.754097 | 120 | 1  | 0 | 4.210906  | 2.645508  | -4.193674 |
| 71  | 6  | 0 | 4.298842  | 5.915469  | -5.362840 | 121 | 1  | 0 | 1.979013  | 4.263279  | 2.623634  |
| 72  | 6  | 0 | 2.474389  | 4.216752  | -5.685533 | 122 | 1  | 0 | 1.764033  | 5.840646  | 4.549361  |
| 73  | 6  | 0 | 4.662789  | 3.540815  | -4.628857 | 123 | 1  | 0 | -0.260162 | 5.738678  | 5.983828  |
| 74  | 6  | 0 | 0.069624  | 3.326059  | 3.040586  | 124 | 1  | 0 | -3.656588 | 5.202165  | 4.303365  |
| 75  | 6  | 0 | 1.103837  | 4.243021  | 3.264064  | 125 | 1  | 0 | -4.591392 | 4.019183  | 5.238318  |
| 76  | 6  | 0 | 0.979431  | 5.118421  | 4.337879  | 126 | 1  | 0 | -3.601558 | 3.486026  | 3.858833  |
| 77  | 6  | 0 | -0.157298 | 5.062086  | 5.143946  | 127 | 1  | 0 | -3.442676 | 2.364096  | 6.757330  |
| 78  | 6  | 0 | -1.152508 | 4.122603  | 4.847250  | 128 | 1  | 0 | -1.675874 | 2.349062  | 6.920684  |
| 79  | 6  | 0 | -2.449629 | 3.964920  | 5.654207  | 129 | 1  | 0 | -2.426136 | 1.793303  | 5.412989  |
| 80  | 6  | 0 | -3.648371 | 4.180284  | 4.701993  | 130 | 1  | 0 | -3.483716 | 4.816548  | 7.358666  |
| 81  | 6  | 0 | -2.500590 | 2.527007  | 6.219913  | 131 | 1  | 0 | -2.528847 | 6.005793  | 6.465910  |
| 82  | 6  | 0 | -2.542921 | 4.967232  | 6.817514  | 132 | 1  | 0 | -1.726268 | 4.837244  | 7.537648  |
| 83  | 6  | 0 | -4.445034 | 0.327982  | -2.597038 | 133 | 1  | 0 | -2.303277 | 0.524314  | -2.452953 |
| 84  | 6  | 0 | -3.182155 | 0.714944  | -3.056575 | 134 | 1  | 0 | -2.066422 | 1.658120  | -4.625307 |
| 85  | 6  | 0 | -3.053837 | 1.365357  | -4.286141 | 135 | 1  | 0 | -4.085933 | 2.130159  | -6.014286 |
| 86  | 6  | 0 | -4.186644 | 1.627257  | -5.056129 | 136 | 1  | 0 | -6.337537 | 1.470425  | -5.190002 |
| 87  | 6  | 0 | -5.453638 | 1.254834  | -4.595812 | 137 | 1  | 0 | -6.575672 | 0.344736  | -3.004026 |
| 88  | 6  | 0 | -5.587326 | 0.614028  | -3.366274 | 138 | 1  | 0 | -5.361714 | -2.015979 | -3.449759 |
| 89  | 6  | 0 | -5.145167 | -2.257238 | -1.313637 | 139 | 1  | 0 | -6.159048 | -4.318179 | -3.828288 |
| 90  | 6  | 0 | -5.470048 | -2.689182 | -2.606893 | 140 | 1  | 0 | -6.392290 | -5.893161 | -1.918423 |
| 91  | 6  | 0 | -5.917269 | -3.993669 | -2.820198 | 141 | 1  | 0 | -5.806482 | -5.142611 | 0.379418  |
| 92  | 6  | 0 | -6.046308 | -4.877361 | -1.748876 | 142 | 1  | 0 | -5.003314 | -2.846301 | 0.767068  |
| 93  | 6  | 0 | -5.719835 | -4.456662 | -0.458294 | 143 | 1  | 0 | -5.315864 | 2.281231  | -0.638675 |
| 94  | 6  | 0 | -5.269556 | -3.155406 | -0.238555 | 144 | 1  | 0 | -7.195210 | 3.434784  | 0.467933  |
| 95  | 6  | 0 | -6.034559 | 0.297131  | -0.179199 | 145 | 1  | 0 | -8.990783 | 2.121399  | 1.582139  |
| 96  | 6  | 0 | -6.100406 | 1.701821  | -0.170084 | 146 | 1  | 0 | -8.894989 | -0.365140 | 1.554453  |
| 97  | 6  | 0 | -7.159902 | 2.348909  | 0.464106  | 147 | 1  | 0 | -7.040435 | -1.520615 | 0.435591  |
| 98  | 6  | 0 | -8.166237 | 1.611956  | 1.090573  | 148 | 6  | 0 | 0.404408  | -0.515457 | -4.093240 |
| 99  | 6  | 0 | -8.111600 | 0.218402  | 1.078580  | 149 | 8  | 0 | 0.165448  | 0.182275  | -5.048356 |
| 100 | 6  | 0 | -7.053627 | -0.436993 | 0.447474  |     |    |   |           |           |           |
| 101 | 16 | 0 | -2.103101 | -3.545613 | -1.321204 |     |    |   |           |           |           |

The total electronic energy was calculated to be -5308.0840323 Hartree.

**Table S3.** Optimized structure of **4c** (B3LYP/6-31G(d))

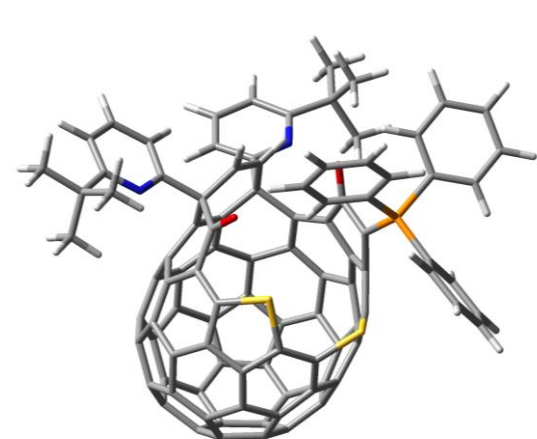

Standard orientation:

| Center Number | Atomic Number | Atomic Type | Coordinates (Angstroms) |           |           |
|---------------|---------------|-------------|-------------------------|-----------|-----------|
|               |               |             | X                       | Y         | Z         |
| 1             | 6             | 0           | -0.474272               | 3.219321  | -0.445680 |
| 2             | 6             | 0           | -0.882819               | 2.960923  | 0.795210  |
| 3             | 6             | 0           | -0.070429               | 2.247700  | 1.849533  |
| 4             | 6             | 0           | -0.641955               | 0.844517  | 2.193963  |
| 5             | 6             | 0           | -1.737092               | 0.237849  | 1.571198  |
| 6             | 6             | 0           | -2.801093               | 0.578649  | 0.511711  |
| 7             | 6             | 0           | -3.134797               | -0.678044 | -0.170223 |
| 8             | 6             | 0           | -2.359181               | -1.755906 | 0.438477  |
| 9             | 6             | 0           | -1.754873               | -2.955113 | 0.030728  |
| 10            | 6             | 0           | -0.808495               | -3.677986 | 0.882436  |
| 11            | 6             | 0           | 0.329670                | -4.464774 | 0.359742  |
| 12            | 6             | 0           | 0.731220                | -4.310998 | -1.056383 |
| 13            | 6             | 0           | -0.065976               | -3.494616 | -1.950898 |
| 14            | 6             | 0           | 0.558379                | -2.615379 | -2.829903 |
| 15            | 16            | 0           | -0.085694               | -0.996303 | -3.321272 |
| 16            | 6             | 0           | 1.549850                | -0.296024 | -3.070308 |
| 17            | 6             | 0           | 1.829960                | 0.919020  | -2.432765 |
| 18            | 6             | 0           | 0.739711                | 1.883855  | -2.186520 |
| 19            | 6             | 0           | 0.889906                | 2.875985  | -0.986246 |
| 20            | 6             | 0           | 1.776641                | 2.241892  | 0.073350  |
| 21            | 6             | 0           | 1.365185                | 2.001389  | 1.373306  |
| 22            | 6             | 0           | 2.229203                | 1.278157  | 2.281080  |
| 23            | 6             | 0           | 1.643362                | 0.336088  | 3.232463  |
| 24            | 6             | 0           | 0.214169                | 0.034673  | 3.072077  |
| 25            | 6             | 0           | -0.175077               | -1.286358 | 3.376611  |
| 26            | 6             | 0           | -1.145010               | -1.923969 | 2.550422  |
| 27            | 6             | 0           | -1.839066               | -1.184117 | 1.653211  |
| 28            | 6             | 0           | -0.714731               | -3.254604 | 2.228725  |
| 29            | 6             | 0           | 0.399122                | -3.530131 | 3.078246  |
| 30            | 6             | 0           | 0.732352                | -2.312363 | 3.804942  |
| 31            | 6             | 0           | 2.046767                | -1.995109 | 4.063981  |
| 32            | 6             | 0           | 2.502309                | -0.644709 | 3.794215  |
| 33            | 6             | 0           | 3.894497                | -0.760922 | 3.407716  |
| 34            | 6             | 0           | 4.428544                | 0.126061  | 2.488983  |
| 35            | 6             | 0           | 3.577332                | 1.141886  | 1.923833  |
| 36            | 6             | 0           | 3.981960                | 1.342817  | 0.552677  |
| 37            | 6             | 0           | 3.036781                | 1.714216  | -0.402928 |

|    |   |   |           |           |           |
|----|---|---|-----------|-----------|-----------|
| 38 | 6 | 0 | 3.081631  | 1.065440  | -1.717736 |
| 39 | 6 | 0 | 4.116015  | 0.140870  | -1.959777 |
| 40 | 6 | 0 | 3.835426  | -1.072374 | -2.675893 |
| 41 | 6 | 0 | 2.540490  | -1.323846 | -3.125620 |
| 42 | 6 | 0 | 1.975809  | -2.640078 | -2.983672 |
| 43 | 6 | 0 | 2.717964  | -3.650928 | -2.382808 |
| 44 | 6 | 0 | 2.089096  | -4.493770 | -1.403186 |
| 45 | 6 | 0 | 3.101898  | -4.853150 | -0.443024 |
| 46 | 6 | 0 | 2.737904  | -5.030218 | 0.875783  |
| 47 | 6 | 0 | 1.352291  | -4.854109 | 1.275554  |
| 48 | 6 | 0 | 1.398502  | -4.374151 | 2.643178  |
| 49 | 6 | 0 | 2.774834  | -4.105968 | 3.017767  |
| 50 | 6 | 0 | 3.097847  | -2.936098 | 3.720184  |
| 51 | 6 | 0 | 4.261742  | -2.169355 | 3.344403  |
| 52 | 6 | 0 | 5.112289  | -2.627236 | 2.332717  |
| 53 | 6 | 0 | 5.680407  | -1.688194 | 1.379483  |
| 54 | 6 | 0 | 5.348323  | -0.334187 | 1.467533  |
| 55 | 6 | 0 | 5.065234  | 0.426622  | 0.271946  |
| 56 | 6 | 0 | 5.128703  | -0.174735 | -0.975117 |
| 57 | 6 | 0 | 5.465087  | -1.583796 | -1.077860 |
| 58 | 6 | 0 | 4.646793  | -2.142042 | -2.131022 |
| 59 | 6 | 0 | 4.090363  | -3.413676 | -1.983502 |
| 60 | 6 | 0 | 4.342865  | -4.178662 | -0.785322 |
| 61 | 6 | 0 | 5.158395  | -3.658801 | 0.221967  |
| 62 | 6 | 0 | 4.783226  | -3.845067 | 1.613425  |
| 63 | 6 | 0 | 3.615392  | -4.546232 | 1.932183  |
| 64 | 6 | 0 | 5.725870  | -2.329476 | 0.077923  |
| 65 | 6 | 0 | 1.567741  | 4.164654  | -1.514405 |
| 66 | 6 | 0 | 1.608058  | 5.317825  | -0.720822 |
| 67 | 6 | 0 | 2.231844  | 6.443785  | -1.243444 |
| 68 | 6 | 0 | 2.786044  | 6.391846  | -2.524085 |
| 69 | 6 | 0 | 2.703102  | 5.201834  | -3.254304 |
| 70 | 6 | 0 | 3.275320  | 5.022449  | -4.667654 |
| 71 | 6 | 0 | 3.893679  | 6.319676  | -5.218154 |
| 72 | 6 | 0 | 2.135530  | 4.567157  | -5.607427 |
| 73 | 6 | 0 | 4.365728  | 3.927267  | -4.617853 |
| 74 | 6 | 0 | -0.116251 | 3.149016  | 3.108666  |
| 75 | 6 | 0 | 0.872039  | 4.103247  | 3.379672  |
| 76 | 6 | 0 | 0.703259  | 4.920212  | 4.492843  |
| 77 | 6 | 0 | -0.431062 | 4.771522  | 5.290553  |
| 78 | 6 | 0 | -1.378756 | 3.799949  | 4.945803  |
| 79 | 6 | 0 | -2.667079 | 3.540509  | 5.740565  |
| 80 | 6 | 0 | -3.874263 | 3.733454  | 4.794166  |
| 81 | 6 | 0 | -2.642309 | 2.078710  | 6.243436  |
| 82 | 6 | 0 | -2.814021 | 4.486093  | 6.945239  |
| 83 | 6 | 0 | -4.517530 | 0.318401  | -2.640706 |
| 84 | 6 | 0 | -3.299374 | 0.878937  | -3.036945 |
| 85 | 6 | 0 | -3.238677 | 1.677235  | -4.181100 |
| 86 | 6 | 0 | -4.389935 | 1.912295  | -4.931959 |
| 87 | 6 | 0 | -5.612484 | 1.361350  | -4.534408 |
| 88 | 6 | 0 | -5.681731 | 0.574610  | -3.386835 |
| 89 | 6 | 0 | -4.971329 | -2.438478 | -1.629758 |
| 90 | 6 | 0 | -5.229348 | -2.772370 | -2.966573 |
| 91 | 6 | 0 | -5.554534 | -4.084507 | -3.312450 |
| 92 | 6 | 0 | -5.627006 | -5.073329 | -2.331411 |
| 93 | 6 | 0 | -5.366124 | -4.750264 | -0.998502 |
| 94 | 6 | 0 | -5.037748 | -3.441733 | -0.646439 |
| 95 | 6 | 0 | -6.096725 | -0.105110 | -0.256829 |
| 96 | 6 | 0 | -6.253905 | 1.276890  | -0.045698 |
| 97 | 6 | 0 | -7.370452 | 1.757851  | 0.636376  |

|     |    |   |           |           |           |     |   |   |           |           |           |
|-----|----|---|-----------|-----------|-----------|-----|---|---|-----------|-----------|-----------|
| 98  | 6  | 0 | -8.344909 | 0.877493  | 1.109749  | 124 | 1 | 0 | -3.938494 | 4.771019  | 4.443970  |
| 99  | 6  | 0 | -8.200184 | -0.492958 | 0.895679  | 125 | 1 | 0 | -4.807980 | 3.495174  | 5.317889  |
| 100 | 6  | 0 | -7.084238 | -0.983555 | 0.216198  | 126 | 1 | 0 | -3.786981 | 3.083631  | 3.919403  |
| 101 | 16 | 0 | -1.828867 | -3.413363 | -1.700983 | 127 | 1 | 0 | -3.576428 | 1.840994  | 6.766697  |
| 102 | 15 | 0 | -4.593243 | -0.718147 | -1.140891 | 128 | 1 | 0 | -1.812044 | 1.915438  | 6.941228  |
| 103 | 7  | 0 | 2.099999  | 4.114088  | -2.735716 | 129 | 1 | 0 | -2.523752 | 1.386443  | 5.405757  |
| 104 | 7  | 0 | -1.204315 | 3.013996  | 3.868894  | 130 | 1 | 0 | -3.746608 | 4.264832  | 7.476431  |
| 105 | 8  | 0 | -3.336810 | 1.671575  | 0.309436  | 131 | 1 | 0 | -2.852791 | 5.537974  | 6.637818  |
| 106 | 8  | 0 | -0.280357 | 1.868991  | -2.860664 | 132 | 1 | 0 | -1.992809 | 4.368213  | 7.662300  |
| 107 | 1  | 0 | -1.149962 | 3.703332  | -1.143571 | 133 | 1 | 0 | -2.403254 | 0.711387  | -2.452716 |
| 108 | 1  | 0 | -1.888059 | 3.228858  | 1.093771  | 134 | 1 | 0 | -2.285653 | 2.111181  | -4.464323 |
| 109 | 1  | 0 | 1.153635  | 5.324469  | 0.264201  | 135 | 1 | 0 | -4.341097 | 2.532677  | -5.823084 |
| 110 | 1  | 0 | 2.285517  | 7.360996  | -0.662374 | 136 | 1 | 0 | -6.512935 | 1.553176  | -5.111613 |
| 111 | 1  | 0 | 3.269836  | 7.267431  | -2.939955 | 137 | 1 | 0 | -6.638712 | 0.169764  | -3.069067 |
| 112 | 1  | 0 | 4.734533  | 6.665815  | -4.605505 | 138 | 1 | 0 | -5.164815 | -2.015219 | -3.739915 |
| 113 | 1  | 0 | 3.157407  | 7.129761  | -5.281163 | 139 | 1 | 0 | -5.746115 | -4.332033 | -4.352686 |
| 114 | 1  | 0 | 4.276990  | 6.143974  | -6.229450 | 140 | 1 | 0 | -5.878196 | -6.094504 | -2.604190 |
| 115 | 1  | 0 | 2.530021  | 4.367901  | -6.611005 | 141 | 1 | 0 | -5.409324 | -5.517308 | -0.230712 |
| 116 | 1  | 0 | 1.363465  | 5.341317  | -5.694471 | 142 | 1 | 0 | -4.823129 | -3.206042 | 0.390907  |
| 117 | 1  | 0 | 1.662718  | 3.657102  | -5.229221 | 143 | 1 | 0 | -5.493127 | 1.963816  | -0.392743 |
| 118 | 1  | 0 | 5.200924  | 4.231542  | -3.975476 | 144 | 1 | 0 | -7.475800 | 2.827087  | 0.797966  |
| 119 | 1  | 0 | 4.762755  | 3.741523  | -5.623140 | 145 | 1 | 0 | -9.214176 | 1.258186  | 1.639368  |
| 120 | 1  | 0 | 3.959281  | 2.991099  | -4.226070 | 146 | 1 | 0 | -8.957569 | -1.186366 | 1.251053  |
| 121 | 1  | 0 | 1.746868  | 4.195877  | 2.745196  | 147 | 1 | 0 | -7.000277 | -2.050765 | 0.047330  |
| 122 | 1  | 0 | 1.451731  | 5.668596  | 4.741207  |     |   |   |           |           |           |
| 123 | 1  | 0 | -0.569320 | 5.401667  | 6.160917  |     |   |   |           |           |           |

-----  
The total electronic energy was calculated to be -5194.74652 Hartree.

## 5.2. Keto-Enol Tautomerization

For the calculations to be simplified, 6-*t*-butylpyridin-2-yl groups were replaced with 2-pyridyl groups for the following calculations.

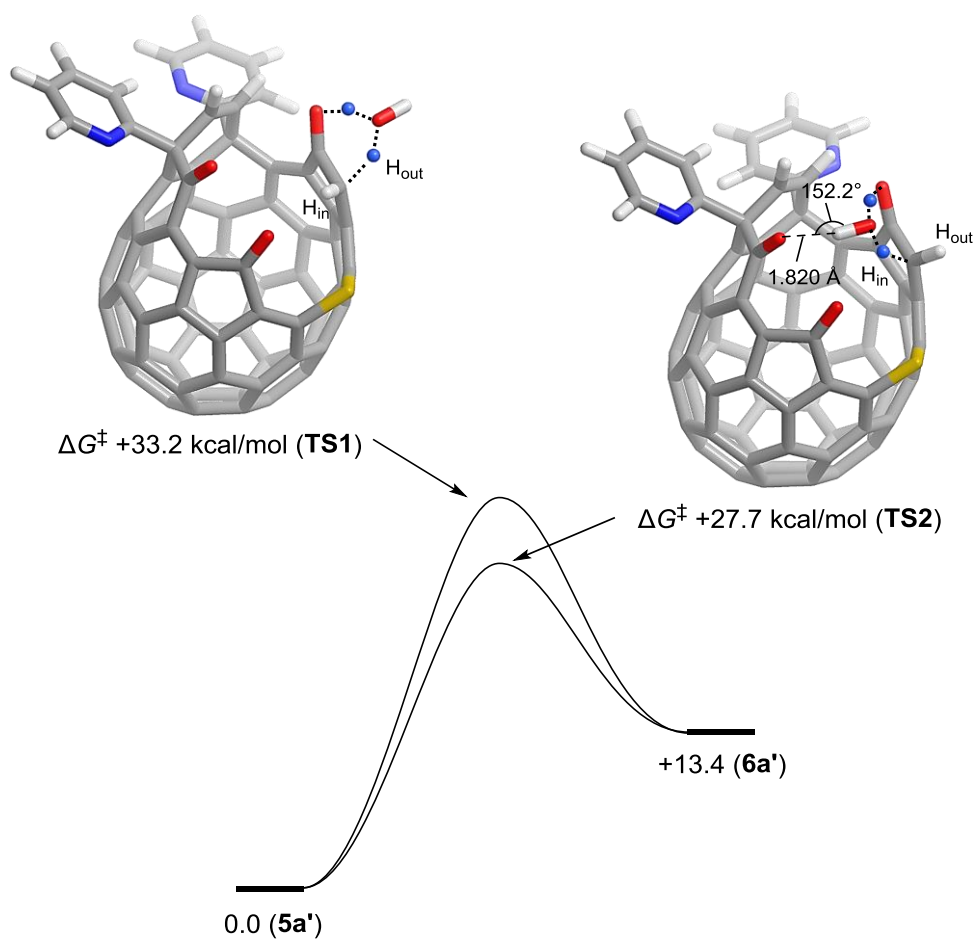

**Figure S21.** Two possible transition states, calculated at the M06-2X/6-31G(d,p) level of theory (298 K).



**Table S4.** Optimized structure of H<sub>2</sub>O (M06-2X/6-31G(d,p))

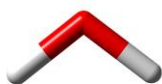

Standard orientation:

| Center Number | Atomic Number | Atomic Type | Coordinates (Angstroms) |           |           |
|---------------|---------------|-------------|-------------------------|-----------|-----------|
|               |               |             | X                       | Y         | Z         |
| 1             | 8             | 0           | 0.000000                | 0.000000  | 0.117808  |
| 2             | 1             | 0           | 0.000000                | 0.760256  | -0.471232 |
| 3             | 1             | 0           | 0.000000                | -0.760256 | -0.471232 |

The total electronic energy was calculated to be  $-76.3839203$  Hartree.

**Table S5.** Optimized structure of **5a'** (M06-2X/6-31G(d,p))

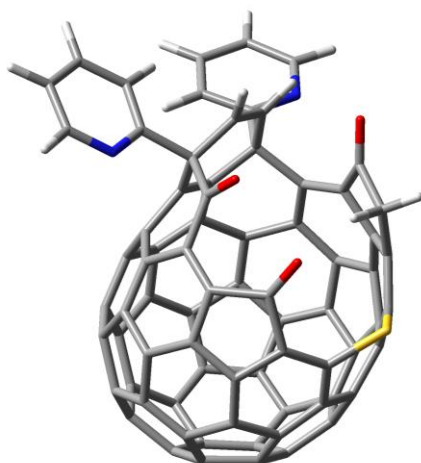

Standard orientation:

| Center Number | Atomic Number | Atomic Type | Coordinates (Angstroms) |           |           |
|---------------|---------------|-------------|-------------------------|-----------|-----------|
|               |               |             | X                       | Y         | Z         |
| 1             | 6             | 0           | 3.828553                | 0.615907  | 1.428005  |
| 2             | 6             | 0           | 3.845181                | -0.700830 | 1.252686  |
| 3             | 6             | 0           | 3.030993                | -1.437368 | 0.221722  |
| 4             | 6             | 0           | 1.859232                | -2.208443 | 0.853598  |
| 5             | 6             | 0           | 1.490842                | -2.123354 | 2.186944  |
| 6             | 6             | 0           | 1.987956                | -1.413202 | 3.445583  |
| 7             | 6             | 0           | -0.399847               | -1.649563 | 3.542845  |
| 8             | 6             | 0           | -1.738225               | -1.337590 | 3.453049  |
| 9             | 6             | 0           | -2.594180               | -1.916798 | 2.428869  |
| 10            | 6             | 0           | -3.694912               | -1.160671 | 1.802940  |
| 11            | 6             | 0           | -3.784703               | 0.295348  | 2.025290  |
| 12            | 6             | 0           | -2.871058               | 0.949417  | 2.953211  |
| 13            | 6             | 0           | -2.285867               | 2.153383  | 2.610380  |
| 14            | 6             | 0           | -0.825875               | 2.548708  | 2.850502  |
| 15            | 6             | 0           | -0.381805               | 3.102455  | 1.473903  |
| 16            | 6             | 0           | 0.775353                | 2.834836  | 0.752378  |
| 17            | 6             | 0           | 2.030048                | 2.356389  | 1.424709  |
| 18            | 6             | 0           | 3.060921                | 1.573196  | 0.560034  |
| 19            | 6             | 0           | 2.347883                | 0.876043  | -0.572803 |
| 20            | 6             | 0           | 2.375031                | -0.482943 | -0.762372 |
| 21            | 6             | 0           | 1.551091                | -1.089031 | -1.782287 |
| 22            | 6             | 0           | 0.881942                | -2.354582 | -1.495773 |
| 23            | 6             | 0           | 0.937198                | -2.824383 | -0.102427 |
| 24            | 6             | 0           | -0.203470               | -3.478700 | 0.380509  |
| 25            | 6             | 0           | -0.643738               | -3.218090 | 1.714419  |
| 26            | 6             | 0           | 0.159734                | -2.504674 | 2.550779  |
| 27            | 6             | 0           | -2.059642               | -2.998263 | 1.713961  |
| 28            | 6             | 0           | -2.533298               | -3.396330 | 0.422488  |
| 29            | 6             | 0           | -1.383272               | -3.697842 | -0.408169 |
| 30            | 6             | 0           | -1.388565               | -3.360856 | -1.738011 |
| 31            | 6             | 0           | -0.227303               | -2.693116 | -2.293678 |
| 32            | 6             | 0           | -0.726310               | -1.812556 | -3.330353 |
| 33            | 6             | 0           | -0.097308               | -0.609909 | -3.568538 |
| 34            | 6             | 0           | 1.043644                | -0.251391 | -2.769936 |
| 35            | 6             | 0           | 0.995640                | 1.175854  | -2.551394 |
| 36            | 6             | 0           | 1.472346                | 1.708360  | -1.363224 |
| 37            | 6             | 0           | 0.706069                | 2.764911  | -0.699128 |
| 38            | 6             | 0           | -0.438360               | 3.237147  | -1.353170 |
| 39            | 6             | 0           | -1.611118               | 3.580894  | -0.600360 |
| 40            | 6             | 0           | -1.580232               | 3.419364  | 0.769290  |
| 41            | 6             | 0           | -2.716354               | 2.832259  | 1.441082  |
| 42            | 6             | 0           | -3.807328               | 2.403803  | 0.721813  |
| 43            | 6             | 0           | -4.340741               | 1.097047  | 1.016991  |
| 44            | 6             | 0           | -4.841173               | 0.560539  | -0.220789 |
| 45            | 6             | 0           | -4.786322               | -0.797392 | -0.425623 |
| 46            | 6             | 0           | -4.231717               | -1.661514 | 0.596970  |
| 47            | 6             | 0           | -3.634679               | -2.778626 | -0.111465 |
| 48            | 6             | 0           | -3.693594               | -2.530829 | -1.536874 |
| 49            | 6             | 0           | -2.587864               | -2.813485 | -2.336457 |
| 50            | 6             | 0           | -2.178709               | -1.872077 | -3.352103 |
| 51            | 6             | 0           | -2.923586               | -0.721695 | -3.582522 |

|    |   |   |           |           |           |    |    |   |           |           |           |
|----|---|---|-----------|-----------|-----------|----|----|---|-----------|-----------|-----------|
| 52 | 6 | 0 | -2.253617 | 0.538598  | -3.849711 | 74 | 16 | 0 | -2.316295 | 0.061375  | 4.381318  |
| 53 | 6 | 0 | -0.867268 | 0.584507  | -3.846422 | 75 | 7  | 0 | 3.598822  | 3.866074  | -0.104804 |
| 54 | 6 | 0 | -0.181558 | 1.684358  | -3.211534 | 76 | 7  | 0 | 4.142792  | -3.595142 | 0.111858  |
| 55 | 6 | 0 | -0.890568 | 2.708955  | -2.621708 | 77 | 8  | 0 | -0.173730 | 2.346090  | 3.835669  |
| 56 | 6 | 0 | -2.340358 | 2.675347  | -2.627125 | 78 | 8  | 0 | 3.110684  | -1.317333 | 3.865062  |
| 57 | 6 | 0 | -2.788745 | 3.206189  | -1.361293 | 79 | 8  | 0 | 2.253622  | 2.572151  | 2.589347  |
| 58 | 6 | 0 | -3.867253 | 2.619633  | -0.709395 | 80 | 6  | 0 | 0.740274  | -0.948671 | 4.234175  |
| 59 | 6 | 0 | -4.534583 | 1.484702  | -1.297993 | 81 | 1  | 0 | 4.395693  | 1.065147  | 2.237568  |
| 60 | 6 | 0 | -4.133701 | 0.997087  | -2.535230 | 82 | 1  | 0 | 4.421179  | -1.331690 | 1.920723  |
| 61 | 6 | 0 | -4.082201 | -0.436199 | -2.758387 | 83 | 1  | 0 | 5.556101  | 1.154511  | -0.487451 |
| 62 | 6 | 0 | -4.434965 | -1.311110 | -1.738254 | 84 | 1  | 0 | 7.050861  | 2.869772  | -1.543436 |
| 63 | 6 | 0 | -3.007243 | 1.603375  | -3.215801 | 85 | 1  | 0 | 6.259870  | 5.251331  | -1.636094 |
| 64 | 6 | 0 | 4.025099  | 2.605114  | -0.051973 | 86 | 1  | 0 | 4.021536  | 5.794665  | -0.683936 |
| 65 | 6 | 0 | 5.259869  | 2.196198  | -0.559499 | 87 | 1  | 0 | 4.526140  | -1.062190 | -2.076113 |
| 66 | 6 | 0 | 6.083088  | 3.151506  | -1.140451 | 88 | 1  | 0 | 6.153879  | -2.681155 | -3.067816 |
| 67 | 6 | 0 | 5.648545  | 4.472668  | -1.194467 | 89 | 1  | 0 | 6.451739  | -4.913757 | -1.959087 |
| 68 | 6 | 0 | 4.400307  | 4.775898  | -0.663220 | 90 | 1  | 0 | 5.118915  | -5.406043 | 0.088572  |
| 69 | 6 | 0 | 3.980393  | -2.414602 | -0.485619 | 91 | 1  | 0 | 0.661693  | 0.145096  | 4.187247  |
| 70 | 6 | 0 | 4.688437  | -2.037661 | -1.628508 | 92 | 1  | 0 | 0.859698  | -1.221819 | 5.286508  |
| 71 | 6 | 0 | 5.591380  | -2.940302 | -2.176443 |    |    |   |           |           |           |
| 72 | 6 | 0 | 5.759966  | -4.178021 | -1.565134 |    |    |   |           |           |           |
| 73 | 6 | 0 | 5.014120  | -4.452270 | -0.423135 |    |    |   |           |           |           |

The total electronic energy was calculated to be -3559.2020868 Hartree.

**Table S6.** Optimized structure of **6a'** (M06-2X/6-31G(d,p))

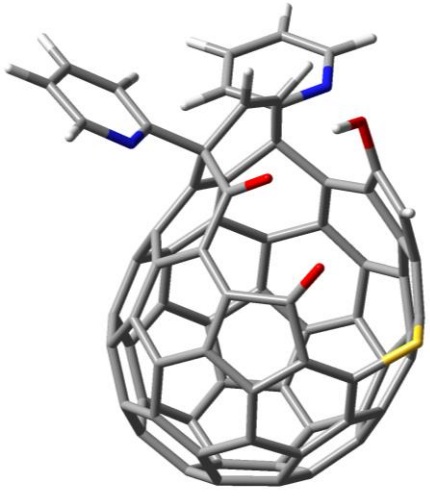

|    |   |   |           |           |           |
|----|---|---|-----------|-----------|-----------|
| 17 | 6 | 0 | 2.067835  | 2.247642  | 1.161937  |
| 18 | 6 | 0 | 3.160832  | 1.545880  | 0.306626  |
| 19 | 6 | 0 | 2.442075  | 0.718584  | -0.726192 |
| 20 | 6 | 0 | 2.432844  | -0.651816 | -0.726945 |
| 21 | 6 | 0 | 1.579586  | -1.363117 | -1.645207 |
| 22 | 6 | 0 | 0.878394  | -2.552932 | -1.174962 |
| 23 | 6 | 0 | 0.916501  | -2.808605 | 0.274818  |
| 24 | 6 | 0 | -0.236850 | -3.377812 | 0.824860  |
| 25 | 6 | 0 | -0.682530 | -2.928297 | 2.107084  |
| 26 | 6 | 0 | 0.110186  | -2.101662 | 2.827065  |
| 27 | 6 | 0 | -2.102700 | -2.717995 | 2.073776  |
| 28 | 6 | 0 | -2.570454 | -3.273396 | 0.840577  |
| 29 | 6 | 0 | -1.415108 | -3.691540 | 0.064313  |
| 30 | 6 | 0 | -1.410556 | -3.538749 | -1.297989 |
| 31 | 6 | 0 | -0.238400 | -2.971938 | -1.927327 |
| 32 | 6 | 0 | -0.718515 | -2.227187 | -3.077108 |
| 33 | 6 | 0 | -0.065576 | -1.081635 | -3.475487 |
| 34 | 6 | 0 | 1.088144  | -0.649960 | -2.733757 |
| 35 | 6 | 0 | 1.068572  | 0.794955  | -2.698509 |
| 36 | 6 | 0 | 1.560458  | 1.459518  | -1.586839 |
| 37 | 6 | 0 | 0.807575  | 2.582903  | -1.021981 |
| 38 | 6 | 0 | -0.325377 | 2.998712  | -1.733811 |
| 39 | 6 | 0 | -1.491931 | 3.451354  | -1.034267 |
| 40 | 6 | 0 | -1.471064 | 3.451448  | 0.345055  |
| 41 | 6 | 0 | -2.636354 | 2.996061  | 1.067736  |
| 42 | 6 | 0 | -3.735120 | 2.513751  | 0.395511  |
| 43 | 6 | 0 | -4.313046 | 1.272076  | 0.846845  |
| 44 | 6 | 0 | -4.809327 | 0.594476  | -0.321736 |
| 45 | 6 | 0 | -4.779375 | -0.779812 | -0.353406 |
| 46 | 6 | 0 | -4.254743 | -1.518495 | 0.778542  |
| 47 | 6 | 0 | -3.663903 | -2.721482 | 0.223894  |
| 48 | 6 | 0 | -3.705239 | -2.654994 | -1.226274 |
| 49 | 6 | 0 | -2.601231 | -3.053975 | -1.973549 |
| 50 | 6 | 0 | -2.172469 | -2.260880 | -3.098689 |
| 51 | 6 | 0 | -2.896410 | -1.135199 | -3.480447 |
| 52 | 6 | 0 | -2.198777 | 0.066508  | -3.900929 |
| 53 | 6 | 0 | -0.812165 | 0.083293  | -3.902935 |
| 54 | 6 | 0 | -0.102916 | 1.239234  | -3.409272 |
| 55 | 6 | 0 | -0.787312 | 2.339399  | -2.939293 |
| 56 | 6 | 0 | -2.237432 | 2.336864  | -2.947275 |
| 57 | 6 | 0 | -2.676690 | 3.025958  | -1.756831 |

Standard orientation:

| Center Number | Atomic Number | Atomic Type | Coordinates (Angstroms) |           |          |
|---------------|---------------|-------------|-------------------------|-----------|----------|
|               |               |             | X                       | Y         | Z        |
| 1             | 6             | 0           | 4.047690                | 0.697855  | 1.172456 |
| 2             | 6             | 0           | 3.977480                | -0.627180 | 1.228581 |
| 3             | 6             | 0           | 3.049621                | -1.468774 | 0.392627 |
| 4             | 6             | 0           | 1.836013                | -2.048266 | 1.148892 |
| 5             | 6             | 0           | 1.445559                | -1.731254 | 2.443534 |
| 6             | 6             | 0           | 1.789303                | -0.680149 | 3.478934 |
| 7             | 6             | 0           | -0.453350               | -1.115537 | 3.690653 |
| 8             | 6             | 0           | -1.804652               | -0.857397 | 3.603046 |
| 9             | 6             | 0           | -2.649136               | -1.563080 | 2.653399 |
| 10            | 6             | 0           | -3.732200               | -0.880561 | 1.925400 |
| 11            | 6             | 0           | -3.795904               | 0.594713  | 1.959786 |
| 12            | 6             | 0           | -2.886568               | 1.345591  | 2.815839 |
| 13            | 6             | 0           | -2.248769               | 2.467150  | 2.323701 |
| 14            | 6             | 0           | -0.786406               | 2.859545  | 2.545031 |
| 15            | 6             | 0           | -0.290835               | 3.169308  | 1.099224 |
| 16            | 6             | 0           | 0.865176                | 2.782344  | 0.426463 |

|    |    |   |           |           |           |    |   |   |           |           |           |
|----|----|---|-----------|-----------|-----------|----|---|---|-----------|-----------|-----------|
| 58 | 6  | 0 | -3.774801 | 2.550981  | -1.050565 | 77 | 8 | 0 | -0.181795 | 2.858785  | 3.577764  |
| 59 | 6  | 0 | -4.469944 | 1.370105  | -1.501323 | 78 | 8 | 0 | 3.013389  | -0.163961 | 3.696618  |
| 60 | 6  | 0 | -4.073193 | 0.724298  | -2.664474 | 79 | 8 | 0 | 2.175272  | 2.307731  | 2.365308  |
| 61 | 6  | 0 | -4.051527 | -0.726803 | -2.707698 | 80 | 6 | 0 | 0.671294  | -0.315537 | 4.161863  |
| 62 | 6  | 0 | -4.424817 | -1.461217 | -1.586606 | 81 | 1 | 0 | 4.738297  | 1.231656  | 1.819537  |
| 63 | 6  | 0 | -2.928936 | 1.217689  | -3.406368 | 82 | 1 | 0 | 4.600816  | -1.177701 | 1.926225  |
| 64 | 6  | 0 | 4.002181  | 2.625584  | -0.381869 | 83 | 1 | 0 | 5.261012  | 1.193821  | -1.380677 |
| 65 | 6  | 0 | 5.053450  | 2.247624  | -1.220055 | 84 | 1 | 0 | 6.636746  | 2.988249  | -2.474755 |
| 66 | 6  | 0 | 5.810516  | 3.243529  | -1.818880 | 85 | 1 | 0 | 6.056825  | 5.386609  | -2.007231 |
| 67 | 6  | 0 | 5.493145  | 4.575449  | -1.560740 | 86 | 1 | 0 | 4.151541  | 5.871131  | -0.477287 |
| 68 | 6  | 0 | 4.429688  | 4.846140  | -0.708691 | 87 | 1 | 0 | 4.379166  | -1.738014 | -2.042137 |
| 69 | 6  | 0 | 3.905649  | -2.632018 | -0.136507 | 88 | 1 | 0 | 5.851381  | -3.642569 | -2.715392 |
| 70 | 6  | 0 | 4.535243  | -2.583591 | -1.380476 | 89 | 1 | 0 | 6.140634  | -5.559063 | -1.120354 |
| 71 | 6  | 0 | 5.352108  | -3.645711 | -1.751510 | 90 | 1 | 0 | 4.964517  | -5.457561 | 1.076608  |
| 72 | 6  | 0 | 5.516674  | -4.708517 | -0.870823 | 91 | 1 | 0 | 0.624759  | 0.492160  | 4.879846  |
| 73 | 6  | 0 | 4.857058  | -4.652754 | 0.353309  | 92 | 1 | 0 | 2.953024  | 0.803413  | 3.610782  |
| 74 | 16 | 0 | -2.398291 | 0.634281  | 4.360375  |    |   |   |           |           |           |
| 75 | 7  | 0 | 3.693488  | 3.895005  | -0.125614 |    |   |   |           |           |           |
| 76 | 7  | 0 | 4.070737  | -3.640896 | 0.719706  |    |   |   |           |           |           |

The total electronic energy was calculated to be -3559.1797667 Hartree.

**Table S7.** Optimized structure of **TS1** (M06-2X/6-31G(d,p))

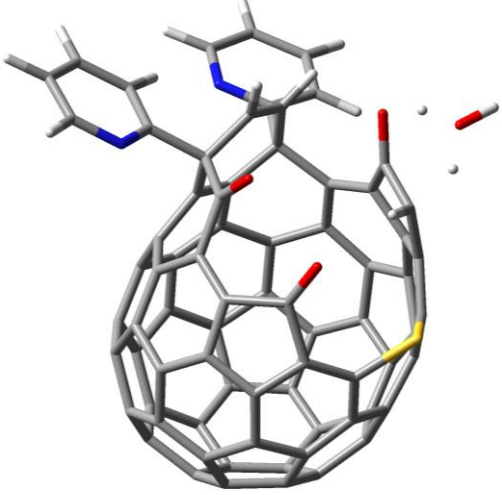

Standard orientation:

| Center Number | Atomic Number | Atomic Type | Coordinates (Angstroms) |           |           |
|---------------|---------------|-------------|-------------------------|-----------|-----------|
|               |               |             | X                       | Y         | Z         |
| 1             | 6             | 0           | 3.835663                | -0.308191 | 1.259255  |
| 2             | 6             | 0           | 3.844649                | -1.140880 | 0.225533  |
| 3             | 6             | 0           | 2.979407                | -1.000527 | -0.998330 |
| 4             | 6             | 0           | 1.842497                | -2.037293 | -1.035170 |
| 5             | 6             | 0           | 1.541465                | -2.916257 | -0.002190 |
| 6             | 6             | 0           | 2.035387                | -3.185261 | 1.408410  |
| 7             | 6             | 0           | -0.270542               | -3.554768 | 1.376790  |
| 8             | 6             | 0           | -1.620881               | -3.338849 | 1.569818  |
| 9             | 6             | 0           | -2.525512               | -3.079860 | 0.459855  |
| 10            | 6             | 0           | -3.654794               | -2.138880 | 0.573223  |
| 11            | 6             | 0           | -3.727385               | -1.240706 | 1.742776  |
| 12            | 6             | 0           | -2.766781               | -1.375151 | 2.830604  |
| 13            | 6             | 0           | -2.197337               | -0.246801 | 3.390255  |
| 14            | 6             | 0           | -0.727225               | -0.072669 | 3.785567  |
| 15            | 6             | 0           | -0.358729               | 1.299925  | 3.163534  |
| 16            | 6             | 0           | 0.760716                | 1.653133  | 2.418541  |
| 17            | 6             | 0           | 2.049147                | 0.889654  | 2.527212  |
| 18            | 6             | 0           | 3.018126                | 0.950189  | 1.315778  |
| 19            | 6             | 0           | 2.242784                | 1.189068  | 0.046754  |
| 20            | 6             | 0           | 2.267283                | 0.343195  | -1.029932 |
| 21            | 6             | 0           | 1.398441                | 0.580973  | -2.156669 |
| 22            | 6             | 0           | 0.745646                | -0.554671 | -2.799510 |
| 23            | 6             | 0           | 0.871175                | -1.854627 | -2.121120 |
| 24            | 6             | 0           | -0.244572               | -2.700342 | -2.183874 |
| 25            | 6             | 0           | -0.616662               | -3.449556 | -1.025463 |
| 26            | 6             | 0           | 0.224424                | -3.483270 | 0.037410  |
| 27            | 6             | 0           | -2.035180               | -3.349737 | -0.826855 |
| 28            | 6             | 0           | -2.570900               | -2.757279 | -2.012653 |
| 29            | 6             | 0           | -1.463525               | -2.358630 | -2.863491 |
| 30            | 6             | 0           | -1.535177               | -1.195851 | -3.586245 |
| 31            | 6             | 0           | -0.404299               | -0.288916 | -3.567872 |
| 32            | 6             | 0           | -0.956958               | 1.044633  | -3.690589 |
| 33            | 6             | 0           | -0.341758               | 2.100213  | -3.053551 |
| 34            | 6             | 0           | 0.838819                | 1.849436  | -2.271240 |
| 35            | 6             | 0           | 0.802774                | 2.730311  | -1.127572 |
| 36            | 6             | 0           | 1.337386                | 2.311549  | 0.080943  |
| 37            | 6             | 0           | 0.612487                | 2.597756  | 1.321036  |
| 38            | 6             | 0           | -0.567249               | 3.346080  | 1.215500  |
| 39            | 6             | 0           | -1.698100               | 3.029159  | 2.039716  |
| 40            | 6             | 0           | -1.593477               | 1.967023  | 2.914523  |
| 41            | 6             | 0           | -2.690105               | 1.034369  | 3.032998  |
| 42            | 6             | 0           | -3.818691               | 1.181144  | 2.260981  |
| 43            | 6             | 0           | -4.336509               | 0.014276  | 1.591586  |
| 44            | 6             | 0           | -4.901518               | 0.463635  | 0.346463  |
| 45            | 6             | 0           | -4.858636               | -0.373331 | -0.742696 |
| 46            | 6             | 0           | -4.252441               | -1.684359 | -0.624170 |
| 47            | 6             | 0           | -3.699166               | -1.982196 | -1.930902 |
| 48            | 6             | 0           | -3.827066               | -0.817124 | -2.784516 |
| 49            | 6             | 0           | -2.765934               | -0.428928 | -3.598716 |
| 50            | 6             | 0           | -2.409426               | 0.965647  | -3.694005 |
| 51            | 6             | 0           | -3.166564               | 1.930187  | -3.037862 |
| 52            | 6             | 0           | -2.509895               | 3.047590  | -2.383383 |
| 53            | 6             | 0           | -1.125247               | 3.128877  | -2.401826 |
| 54            | 6             | 0           | -0.407379               | 3.511091  | -1.209402 |
| 55            | 6             | 0           | -1.084993               | 3.820453  | -0.049275 |
| 56            | 6             | 0           | -2.533109               | 3.745092  | -0.022158 |
| 57            | 6             | 0           | -2.913983               | 3.239301  | 1.275695  |
| 58            | 6             | 0           | -3.954581               | 2.324063  | 1.380994  |
| 59            | 6             | 0           | -4.653295               | 1.886484  | 0.197509  |
| 60            | 6             | 0           | -4.318977               | 2.403556  | -1.047469 |
| 61            | 6             | 0           | -4.280002               | 1.525165  | -2.202665 |
| 62            | 6             | 0           | -4.578073               | 0.175009  | -2.058294 |
| 63            | 6             | 0           | -3.230456               | 3.352957  | -1.162441 |

|    |    |   |           |           |           |    |   |   |          |           |           |
|----|----|---|-----------|-----------|-----------|----|---|---|----------|-----------|-----------|
| 64 | 6  | 0 | 3.961821  | 2.149362  | 1.508937  | 82 | 1 | 0 | 4.469464 | -2.026740 | 0.254900  |
| 65 | 6  | 0 | 4.995606  | 2.348739  | 0.589064  | 83 | 1 | 0 | 5.115501 | 1.661652  | -0.245611 |
| 66 | 6  | 0 | 5.828023  | 3.443226  | 0.770614  | 84 | 1 | 0 | 6.642217 | 3.634658  | 0.078618  |
| 67 | 6  | 0 | 5.599735  | 4.293094  | 1.851328  | 85 | 1 | 0 | 6.226923 | 5.158686  | 2.032768  |
| 68 | 6  | 0 | 4.535354  | 4.010349  | 2.698020  | 86 | 1 | 0 | 4.316175 | 4.652497  | 3.547423  |
| 69 | 6  | 0 | 3.908687  | -1.121387 | -2.215218 | 87 | 1 | 0 | 3.390777 | -3.150127 | -2.727956 |
| 70 | 6  | 0 | 4.013919  | -2.294007 | -2.961352 | 88 | 1 | 0 | 5.029777 | -3.236849 | -4.608855 |
| 71 | 6  | 0 | 4.928530  | -2.338071 | -4.008671 | 89 | 1 | 0 | 6.424218 | -1.201436 | -5.081639 |
| 72 | 6  | 0 | 5.702825  | -1.215860 | -4.272609 | 90 | 1 | 0 | 6.120111 | 0.801372  | -3.631312 |
| 73 | 6  | 0 | 5.530449  | -0.096760 | -3.461919 | 91 | 1 | 0 | 3.136241 | -4.183919 | 2.792254  |
| 74 | 16 | 0 | -2.151202 | -2.985920 | 3.226263  | 92 | 1 | 0 | 0.837871 | -2.982276 | 3.222290  |
| 75 | 7  | 0 | 3.723844  | 2.960592  | 2.535936  | 93 | 8 | 0 | 2.625772 | -4.935732 | 3.443138  |
| 76 | 7  | 0 | 4.661918  | -0.043337 | -2.453624 | 94 | 1 | 0 | 1.626466 | -4.617820 | 2.970322  |
| 77 | 8  | 0 | -0.024244 | -0.873727 | 4.333029  | 95 | 1 | 0 | 2.873604 | -5.828000 | 3.167282  |
| 78 | 8  | 0 | 3.230346  | -3.341927 | 1.769563  |    |   |   |          |           |           |
| 79 | 8  | 0 | 2.333386  | 0.249834  | 3.508354  |    |   |   |          |           |           |
| 80 | 6  | 0 | 0.896684  | -3.495172 | 2.259314  |    |   |   |          |           |           |
| 81 | 1  | 0 | 4.446550  | -0.514124 | 2.132450  |    |   |   |          |           |           |

The total electronic energy was calculated to be  $-3635.54621$  Hartree.  
The imaginary frequency was found at  $-1426.42$   $\text{cm}^{-1}$ .

**Table S8.** Optimized structure of TS2 (M06-2X/6-31G(d,p))

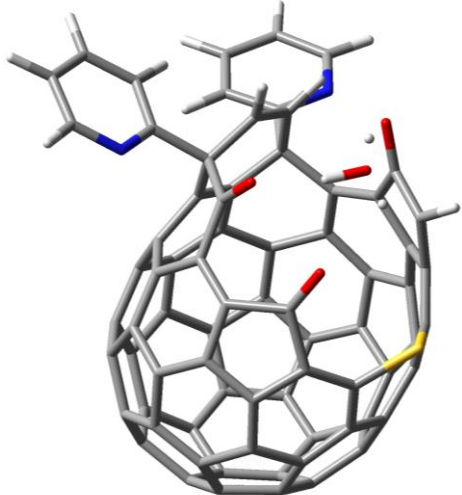

|    |   |   |           |           |           |
|----|---|---|-----------|-----------|-----------|
| 21 | 6 | 0 | -1.369943 | 1.387167  | -1.762010 |
| 22 | 6 | 0 | -0.681967 | 2.581461  | -1.281898 |
| 23 | 6 | 0 | -0.788230 | 2.869542  | 0.156758  |
| 24 | 6 | 0 | 0.347188  | 3.431941  | 0.753503  |
| 25 | 6 | 0 | 0.721481  | 3.002623  | 2.061260  |
| 26 | 6 | 0 | -0.137485 | 2.236720  | 2.774311  |
| 27 | 6 | 0 | 2.130662  | 2.741900  | 2.098615  |
| 28 | 6 | 0 | 2.669574  | 3.267735  | 0.883978  |
| 29 | 6 | 0 | 1.566562  | 3.708951  | 0.048065  |
| 30 | 6 | 0 | 1.622369  | 3.540612  | -1.311049 |
| 31 | 6 | 0 | 0.469272  | 2.984179  | -1.988678 |
| 32 | 6 | 0 | 0.989535  | 2.228203  | -3.110812 |
| 33 | 6 | 0 | 0.337297  | 1.091808  | -3.534455 |
| 34 | 6 | 0 | -0.848304 | 0.672855  | -2.836226 |
| 35 | 6 | 0 | -0.857698 | -0.771347 | -2.817071 |
| 36 | 6 | 0 | -1.414762 | -1.442460 | -1.740680 |
| 37 | 6 | 0 | -0.717446 | -2.608195 | -1.193121 |
| 38 | 6 | 0 | 0.449850  | -3.024903 | -1.844930 |
| 39 | 6 | 0 | 1.572031  | -3.496864 | -1.084900 |
| 40 | 6 | 0 | 1.474690  | -3.510908 | 0.292108  |
| 41 | 6 | 0 | 2.585122  | -3.045917 | 1.090682  |
| 42 | 6 | 0 | 3.722695  | -2.567520 | 0.487656  |
| 43 | 6 | 0 | 4.277347  | -1.328443 | 0.974346  |
| 44 | 6 | 0 | 4.864174  | -0.663000 | -0.157823 |
| 45 | 6 | 0 | 4.864272  | 0.711110  | -0.190458 |
| 46 | 6 | 0 | 4.292700  | 1.462439  | 0.908390  |
| 47 | 6 | 0 | 3.776885  | 2.684736  | 0.322932  |
| 48 | 6 | 0 | 3.888911  | 2.611043  | -1.120287 |
| 49 | 6 | 0 | 2.832690  | 3.031543  | -1.925317 |
| 50 | 6 | 0 | 2.443293  | 2.240131  | -3.066336 |
| 51 | 6 | 0 | 3.165104  | 1.103007  | -3.413358 |
| 52 | 6 | 0 | 2.469681  | -0.086033 | -3.870410 |
| 53 | 6 | 0 | 1.083688  | -0.081734 | -3.936332 |
| 54 | 6 | 0 | 0.335119  | -1.230752 | -3.487063 |
| 55 | 6 | 0 | 0.982968  | -2.349521 | -3.008298 |
| 56 | 6 | 0 | 2.431743  | -2.364992 | -2.938797 |
| 57 | 6 | 0 | 2.797400  | -3.070012 | -1.733063 |
| 58 | 6 | 0 | 3.851325  | -2.605234 | -0.954788 |
| 59 | 6 | 0 | 4.585820  | -1.432180 | -1.357892 |
| 60 | 6 | 0 | 4.266965  | -0.777681 | -2.540997 |
| 61 | 6 | 0 | 4.272244  | 0.673732  | -2.582123 |
| 62 | 6 | 0 | 4.598903  | 1.399327  | -1.441909 |
| 63 | 6 | 0 | 3.159162  | -1.249851 | -3.347493 |
| 64 | 6 | 0 | -4.059433 | -2.402998 | -0.695058 |
| 65 | 6 | 0 | -5.205773 | -1.846482 | -1.265374 |

Standard orientation:

| Center Number | Atomic Number | Atomic Type | Coordinates (Angstroms) |           |           |
|---------------|---------------|-------------|-------------------------|-----------|-----------|
|               |               |             | X                       | Y         | Z         |
| 1             | 6             | 0           | -3.873425               | -0.653049 | 1.059487  |
| 2             | 6             | 0           | -3.812289               | 0.673539  | 1.093099  |
| 3             | 6             | 0           | -2.922231               | 1.514491  | 0.218638  |
| 4             | 6             | 0           | -1.762529               | 2.161502  | 1.002193  |
| 5             | 6             | 0           | -1.465382               | 1.929395  | 2.339926  |
| 6             | 6             | 0           | -1.992086               | 1.049643  | 3.499383  |
| 7             | 6             | 0           | 0.336749                | 1.258568  | 3.705163  |
| 8             | 6             | 0           | 1.672350                | 0.903813  | 3.620463  |
| 9             | 6             | 0           | 2.587544                | 1.557368  | 2.699839  |
| 10            | 6             | 0           | 3.677385                | 0.836968  | 2.018112  |
| 11            | 6             | 0           | 3.691195                | -0.638708 | 2.046704  |
| 12            | 6             | 0           | 2.706007                | -1.368570 | 2.837846  |
| 13            | 6             | 0           | 2.109325                | -2.504342 | 2.314040  |
| 14            | 6             | 0           | 0.637478                | -2.877221 | 2.422616  |
| 15            | 6             | 0           | 0.250341                | -3.251467 | 0.970369  |
| 16            | 6             | 0           | -0.863785               | -2.867499 | 0.230396  |
| 17            | 6             | 0           | -2.138444               | -2.447196 | 0.885101  |
| 18            | 6             | 0           | -3.092936               | -1.510097 | 0.102041  |
| 19            | 6             | 0           | -2.292072               | -0.689223 | -0.878326 |
| 20            | 6             | 0           | -2.255014               | 0.681961  | -0.865127 |

|    |    |   |           |           |           |    |   |   |           |           |           |
|----|----|---|-----------|-----------|-----------|----|---|---|-----------|-----------|-----------|
| 66 | 6  | 0 | -6.040962 | -2.673362 | -2.003407 | 83 | 1 | 0 | -5.426223 | -0.793939 | -1.116996 |
| 67 | 6  | 0 | -5.704633 | -4.017009 | -2.145508 | 84 | 1 | 0 | -6.943095 | -2.277153 | -2.458682 |
| 68 | 6  | 0 | -4.539654 | -4.471568 | -1.539385 | 85 | 1 | 0 | -6.329569 | -4.698411 | -2.711304 |
| 69 | 6  | 0 | -3.817313 | 2.608444  | -0.385898 | 86 | 1 | 0 | -4.240094 | -5.513096 | -1.623263 |
| 70 | 6  | 0 | -4.434300 | 2.442341  | -1.627718 | 87 | 1 | 0 | -4.240109 | 1.555785  | -2.222785 |
| 71 | 6  | 0 | -5.285127 | 3.441392  | -2.085284 | 88 | 1 | 0 | -5.772727 | 3.346151  | -3.050434 |
| 72 | 6  | 0 | -5.495625 | 4.561678  | -1.289605 | 89 | 1 | 0 | -6.146705 | 5.368255  | -1.606785 |
| 73 | 6  | 0 | -4.844937 | 4.623689  | -0.060980 | 90 | 1 | 0 | -4.987090 | 5.478222  | 0.596503  |
| 74 | 16 | 0 | 2.118360  | -0.657823 | 4.344466  | 91 | 1 | 0 | -2.928041 | -0.885966 | 4.209518  |
| 75 | 7  | 0 | -3.726699 | -3.685465 | -0.827895 | 92 | 1 | 0 | -1.351977 | -0.903486 | 4.252975  |
| 76 | 7  | 0 | -4.025369 | 3.673022  | 0.388620  | 93 | 8 | 0 | -2.226058 | -1.578398 | 4.414260  |
| 77 | 8  | 0 | -0.071659 | -2.778070 | 3.388616  | 94 | 1 | 0 | -0.946180 | 0.455343  | 5.330601  |
| 78 | 8  | 0 | -3.167040 | 0.710886  | 3.719511  | 95 | 1 | 0 | -2.201445 | -2.264342 | 3.713205  |
| 79 | 8  | 0 | -2.441113 | -2.823163 | 1.997976  |    |   |   |           |           |           |
| 80 | 6  | 0 | -0.844696 | 0.594380  | 4.255578  |    |   |   |           |           |           |
| 81 | 1  | 0 | -4.523623 | -1.184634 | 1.748363  |    |   |   |           |           |           |
| 82 | 1  | 0 | -4.397109 | 1.225922  | 1.819536  |    |   |   |           |           |           |

-----  
The total electronic energy was calculated to be  $-3635.5592081$  Hartree.

The imaginary frequency was found at  $-769.78$   $\text{cm}^{-1}$ .

## 6. References

- (1) K. Kurotobi, Y. Murata, *Science*, 2011, **33**, 613–616.
- (2) Y. Hashikawa, S. Okamoto, Y. Murata, *Commun. Chem.*, 2020, **3**, 90.
- (3) M. J. Frisch, G. W. Trucks, H. B. Schlegel, G. E. Scuseria, M. A. Robb, J. R. Cheeseman, G. Scalmani, V. Barone, B. Mennucci, G. A. Petersson, H. Nakatsuji, M. Caricato, X. Li, H. P. Hratchian, A. F. Izmaylov, J. Bloino, G. Zheng, J. L. Sonnenberg, M. Hada, M. Ehara, K. Toyota, R. Fukuda, J. Hasegawa, M. Ishida, T. Nakajima, Y. Honda, O. Kitao, H. Nakai, T. Vreven, J. A. Montgomery, Jr., J. E. Peralta, F. Ogliaro, M. Bearpark, J. J. Heyd, E. Brothers, K. N. Kudin, V. N. Staroverov, T. Keith, R. Kobayashi, J. Normand, K. Raghavachari, A. Rendell, J. C. Burant, S. S. Iyengar, J. Tomasi, M. Cossi, N. Rega, J. M. Millam, M. Klene, J. E. Knox, J. B. Cross, V. Bakken, C. Adamo, J. Jaramillo, R. Gomperts, R. E. Stratmann, O. Yazyev, A. J. Austin, R. Cammi, C. Pomelli, J. W. Ochterski, R. L. Martin, K. Morokuma, V. G. Zakrzewski, G. A. Voth, P. Salvador, J. J. Dannenberg, S. Dapprich, A. D. Daniels, O. Farkas, J. B. Foresman, J. V. Ortiz, J. Cioslowski and D. J. Fox, *Gaussian 09, Revision E.01*, Gaussian, Inc., Wallingford CT, 2016.
- (4) T. Futagoishi, M. Murata, A. Wakamiya, T. Sasamori, Y. Murata, *Org. Lett.*, 2013, **15**, 2750–2753.
